# Supplementary material for: A thermodynamic view on the microsolvation of ions by rare gas: application to Li+ with argon
Source: Royal Society of Chemistry journal article supplement (doi:10.1039/d0cp01283a), 2020-01-01
Supplement: d0cp01283a1.pdf [file d0cp01283a1.pdf]

## Supporting Information

# A thermodynamic view on the microsolvation of ions by rare gas: application to $\text{Li}^+$ with argon

M. N. Guimarães,<sup>†</sup> M. M. de Almeida,<sup>†</sup> J. M. C. Marques,<sup>\*,‡</sup> and F. V.

Prudente<sup>\*,†,‡</sup>

<sup>†</sup>*Instituto de Física, Universidade Federal da Bahia, 40170-115 Salvador, Bahia, Brazil*

<sup>‡</sup>*CQC, Department of Chemistry, University of Coimbra, 3004-535 Coimbra, Portugal*

E-mail: qtmarque@ci.uc.pt; prudente@ufba.br

## Reduced heat capacity and mean Lindemann index plots

In order to facilitate the analysis, the reduced heat capacity ( $c_V$ ) and the mean Lindemann index ( $\langle\delta\rangle$ ) curves displayed in Figs. 3, 4 and 10 of the paper for both PES I and PES II are shown here by individual plots for each cluster.

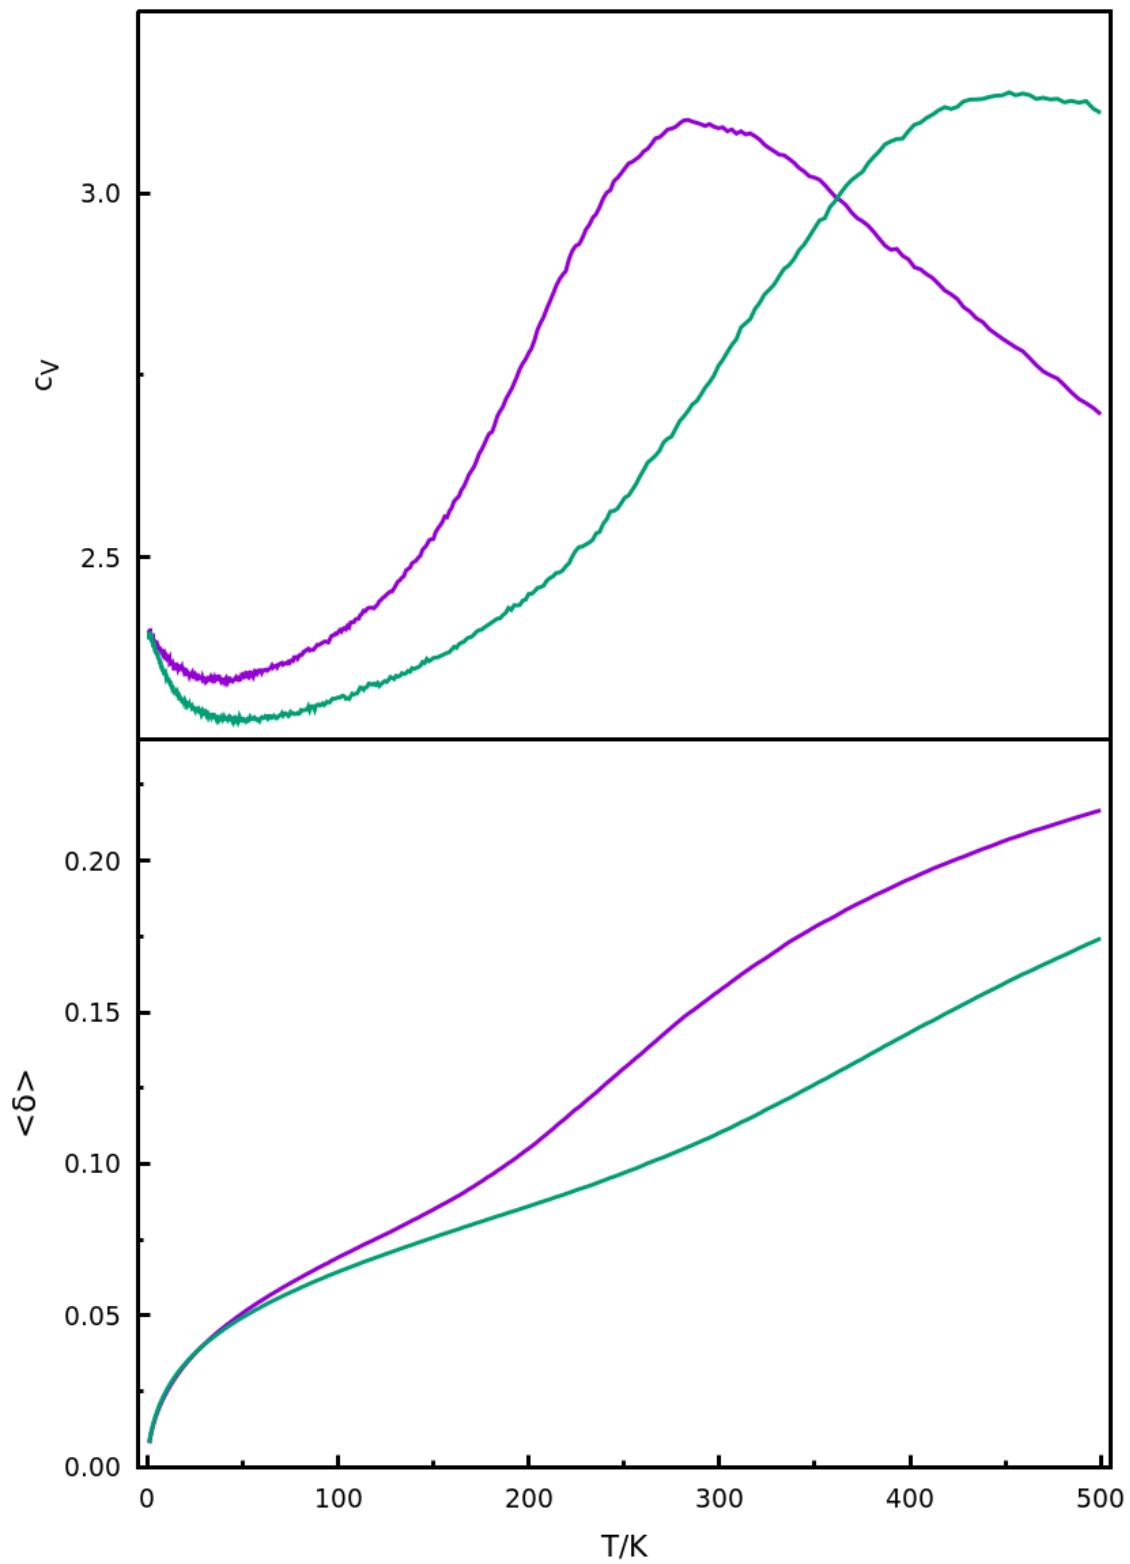

Figure S1:  $\text{Li}^+\text{Ar}_4$  reduced heat capacity and mean Lindemann index modeled with PES I (magenta) and PES II (green).

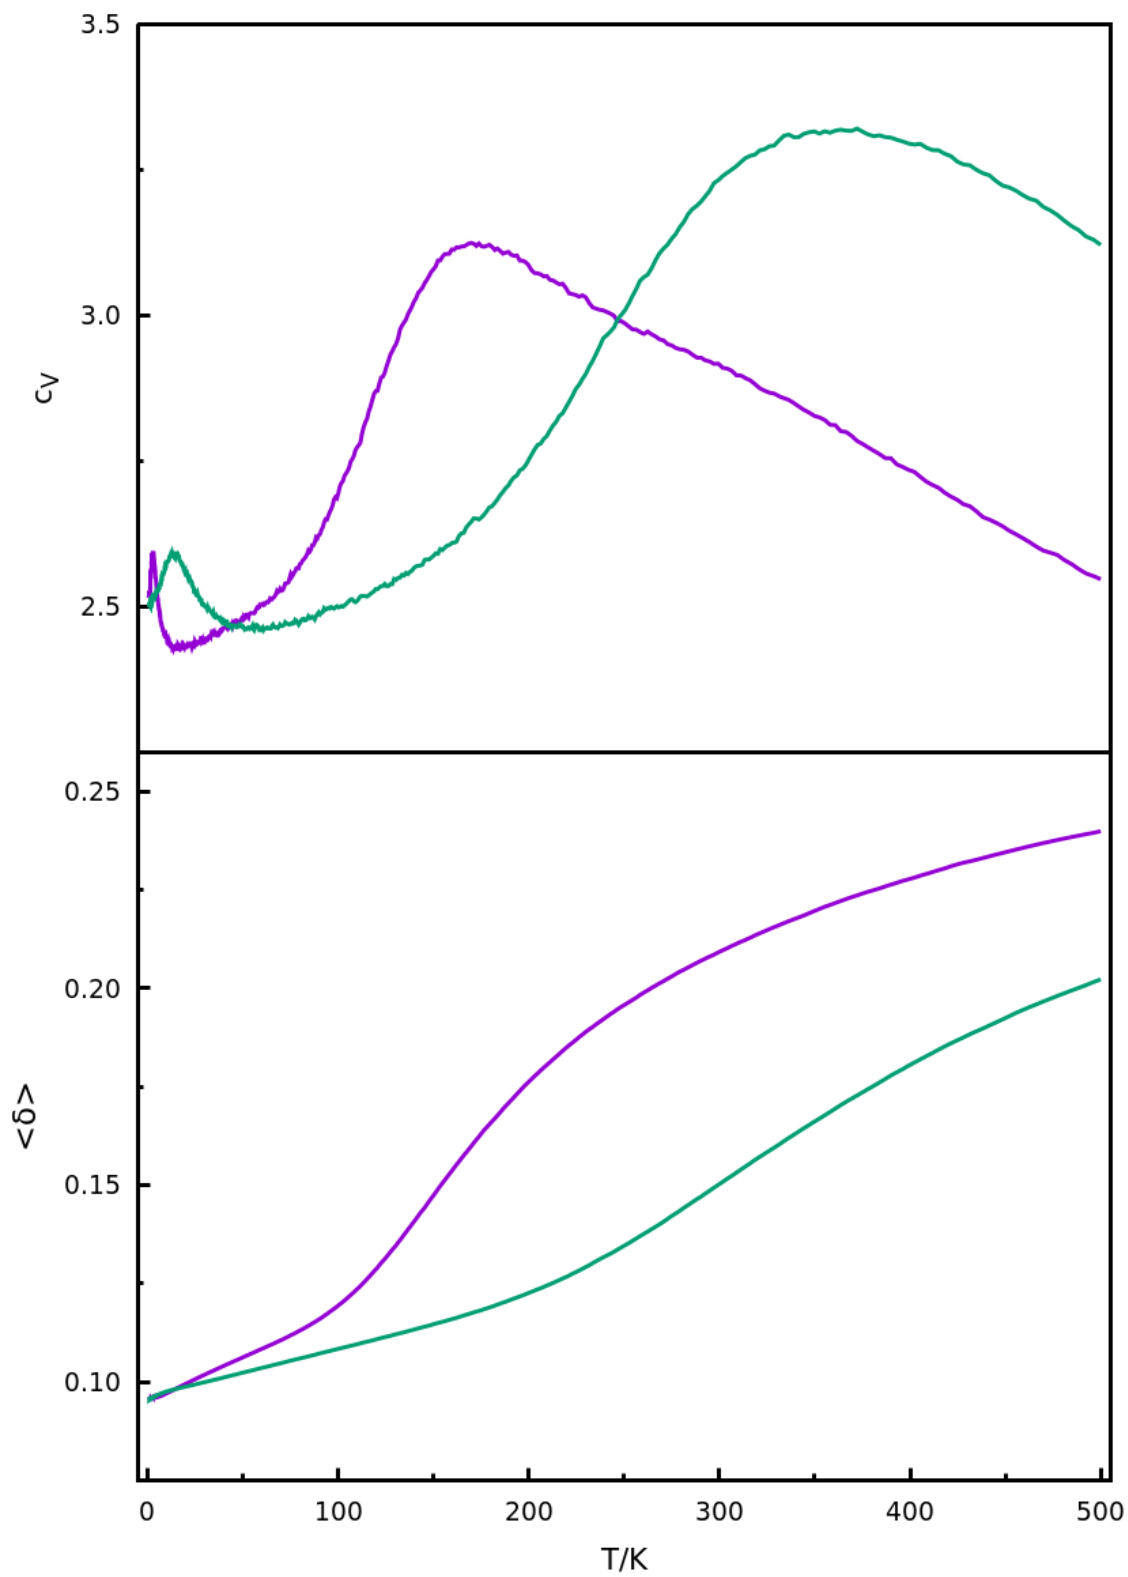

Figure S2:  $\text{Li}^+\text{Ar}_5$  reduced heat capacity and mean Lindemann index modeled with PES I (magenta) and PES II (green).

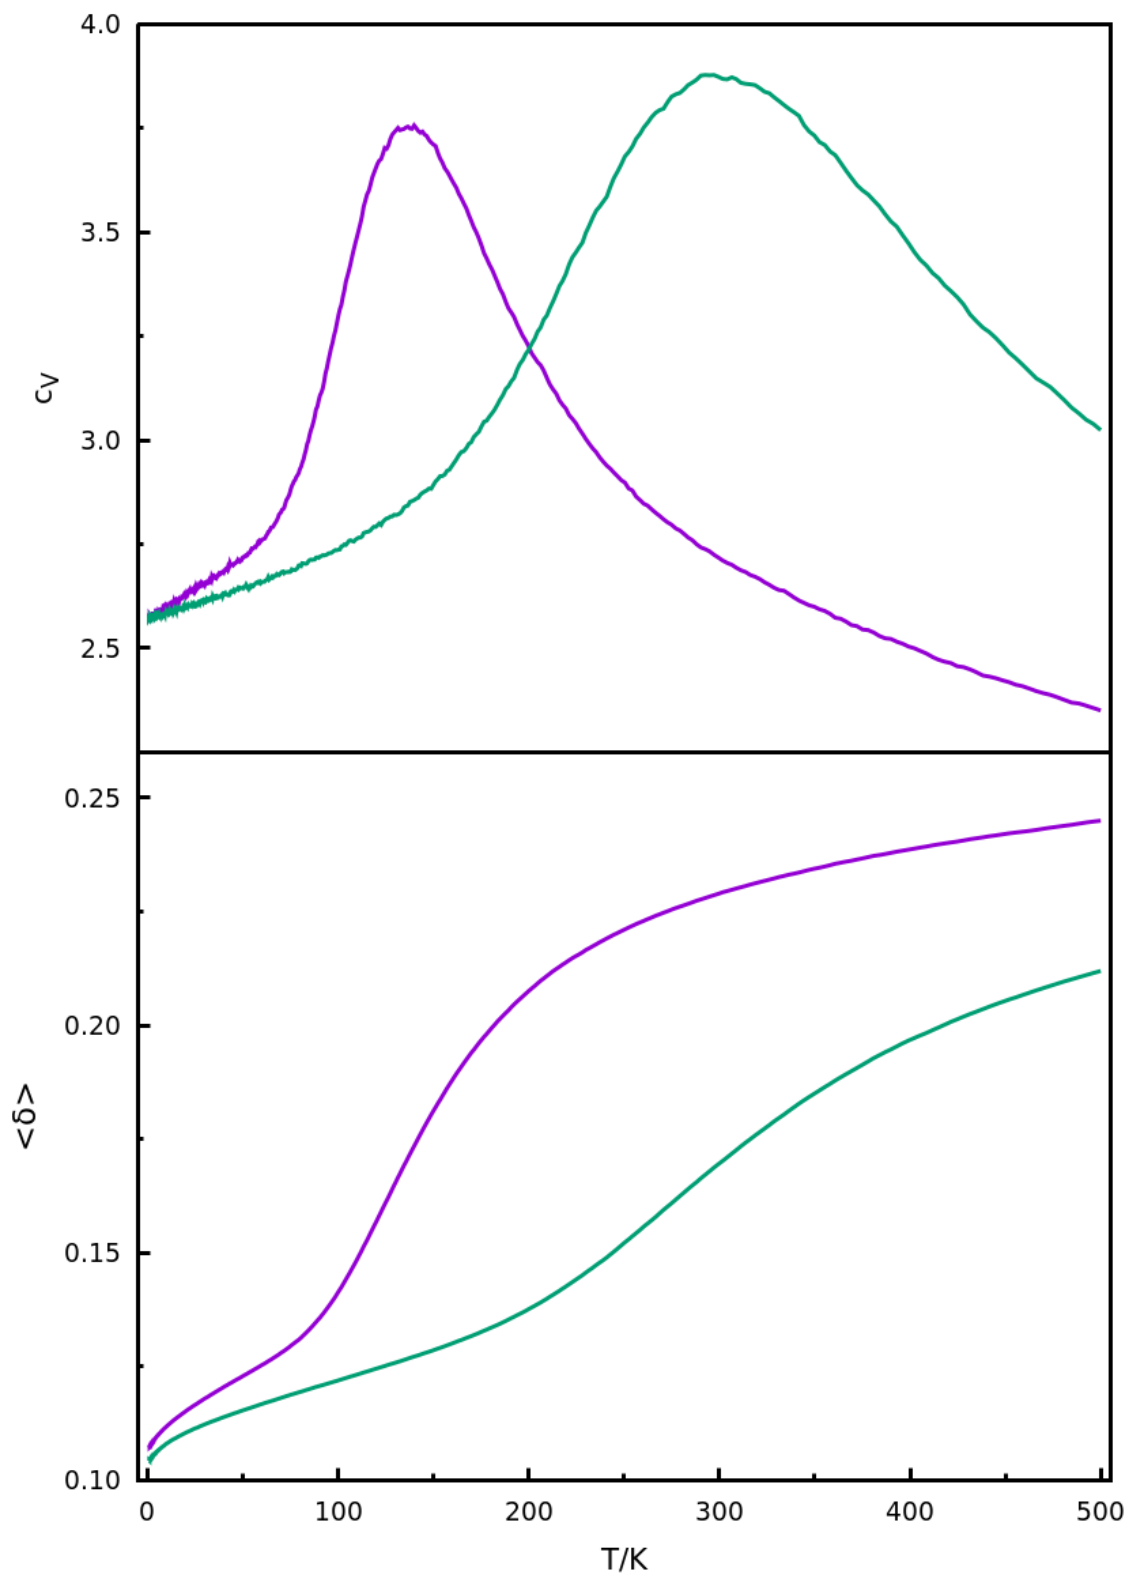

Figure S3:  $\text{Li}^+\text{Ar}_6$  reduced heat capacity and mean Lindemann index modeled with PES I (magenta) and PES II (green).

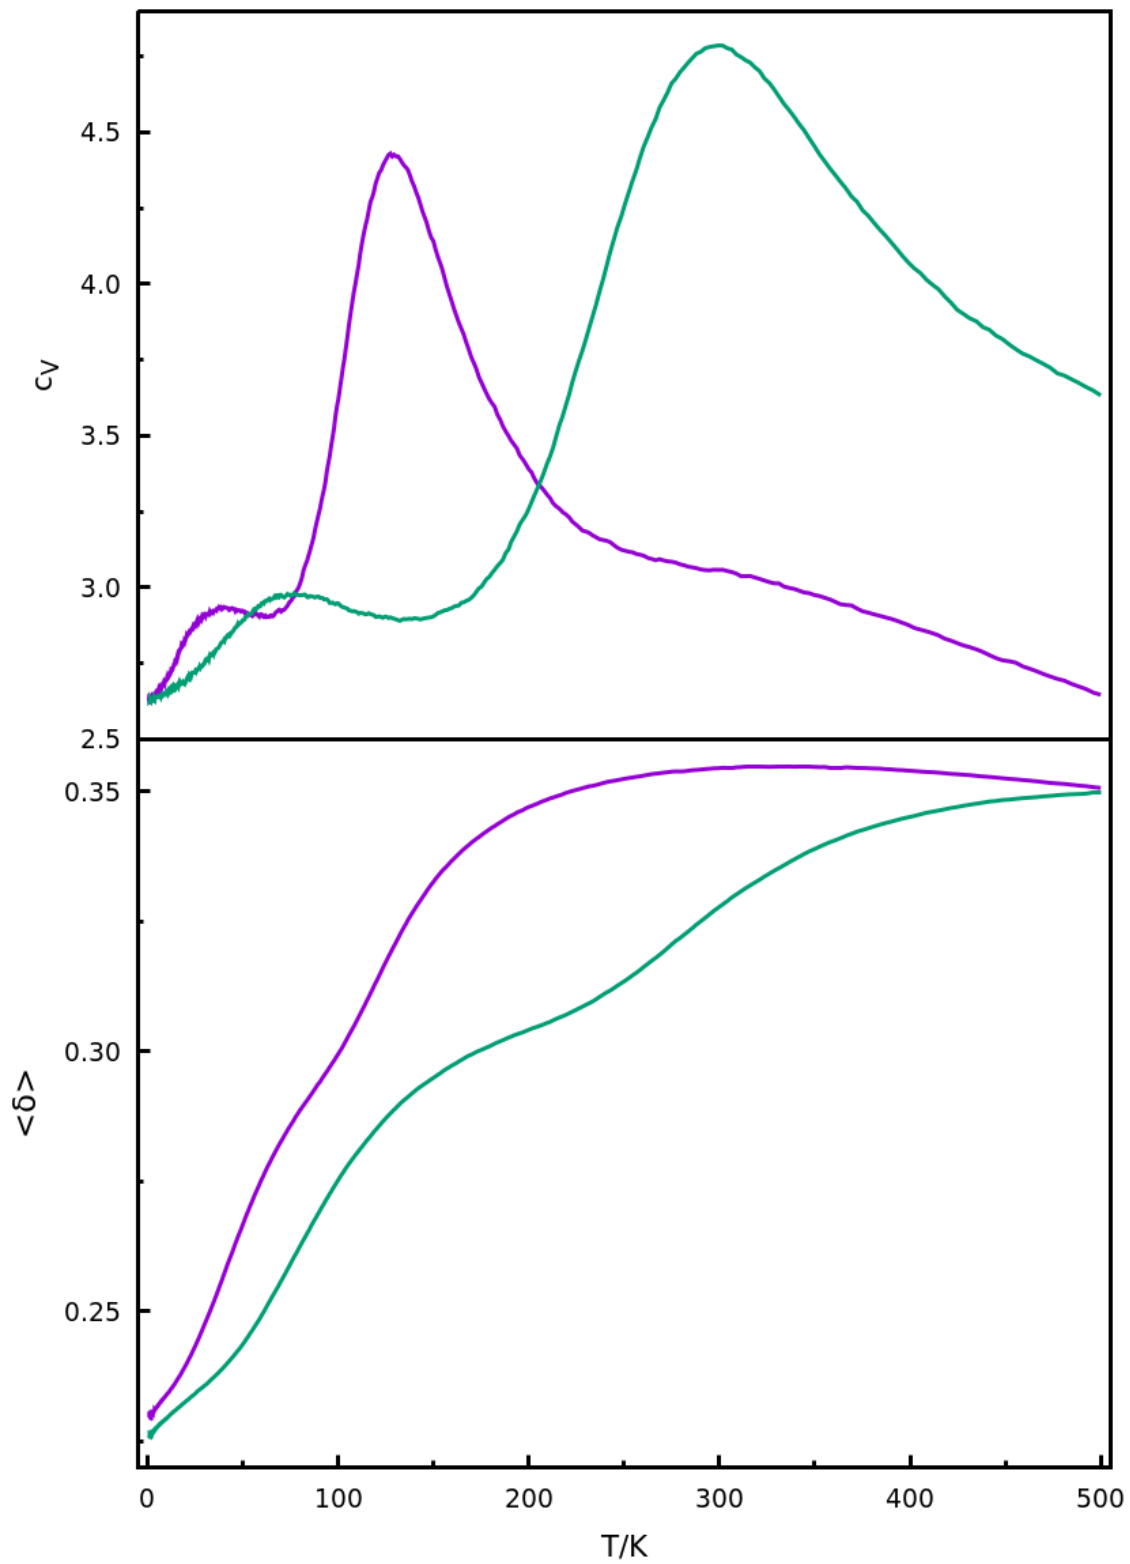

Figure S4:  $\text{Li}^+\text{Ar}_7$  reduced heat capacity and mean Lindemann index modeled with PES I (magenta) and PES II (green).

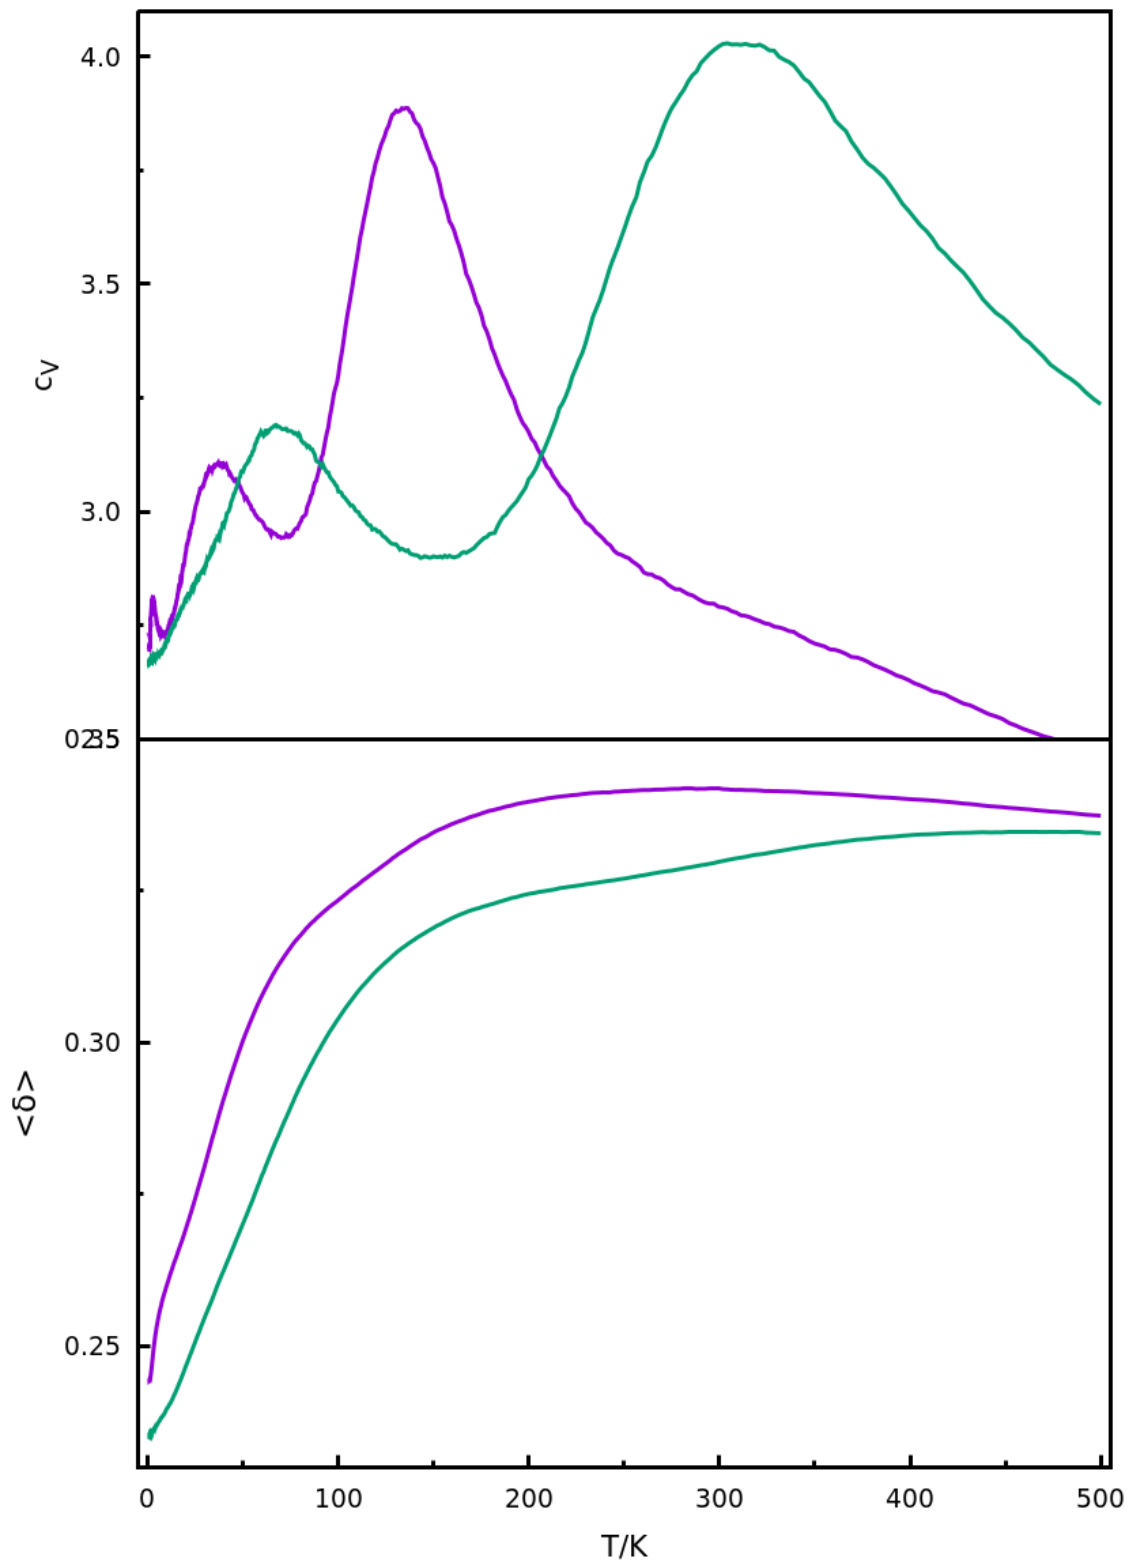

Figure S5:  $\text{Li}^+\text{Ar}_8$  reduced heat capacity and mean Lindemann index modeled with PES I (magenta) and PES II (green).

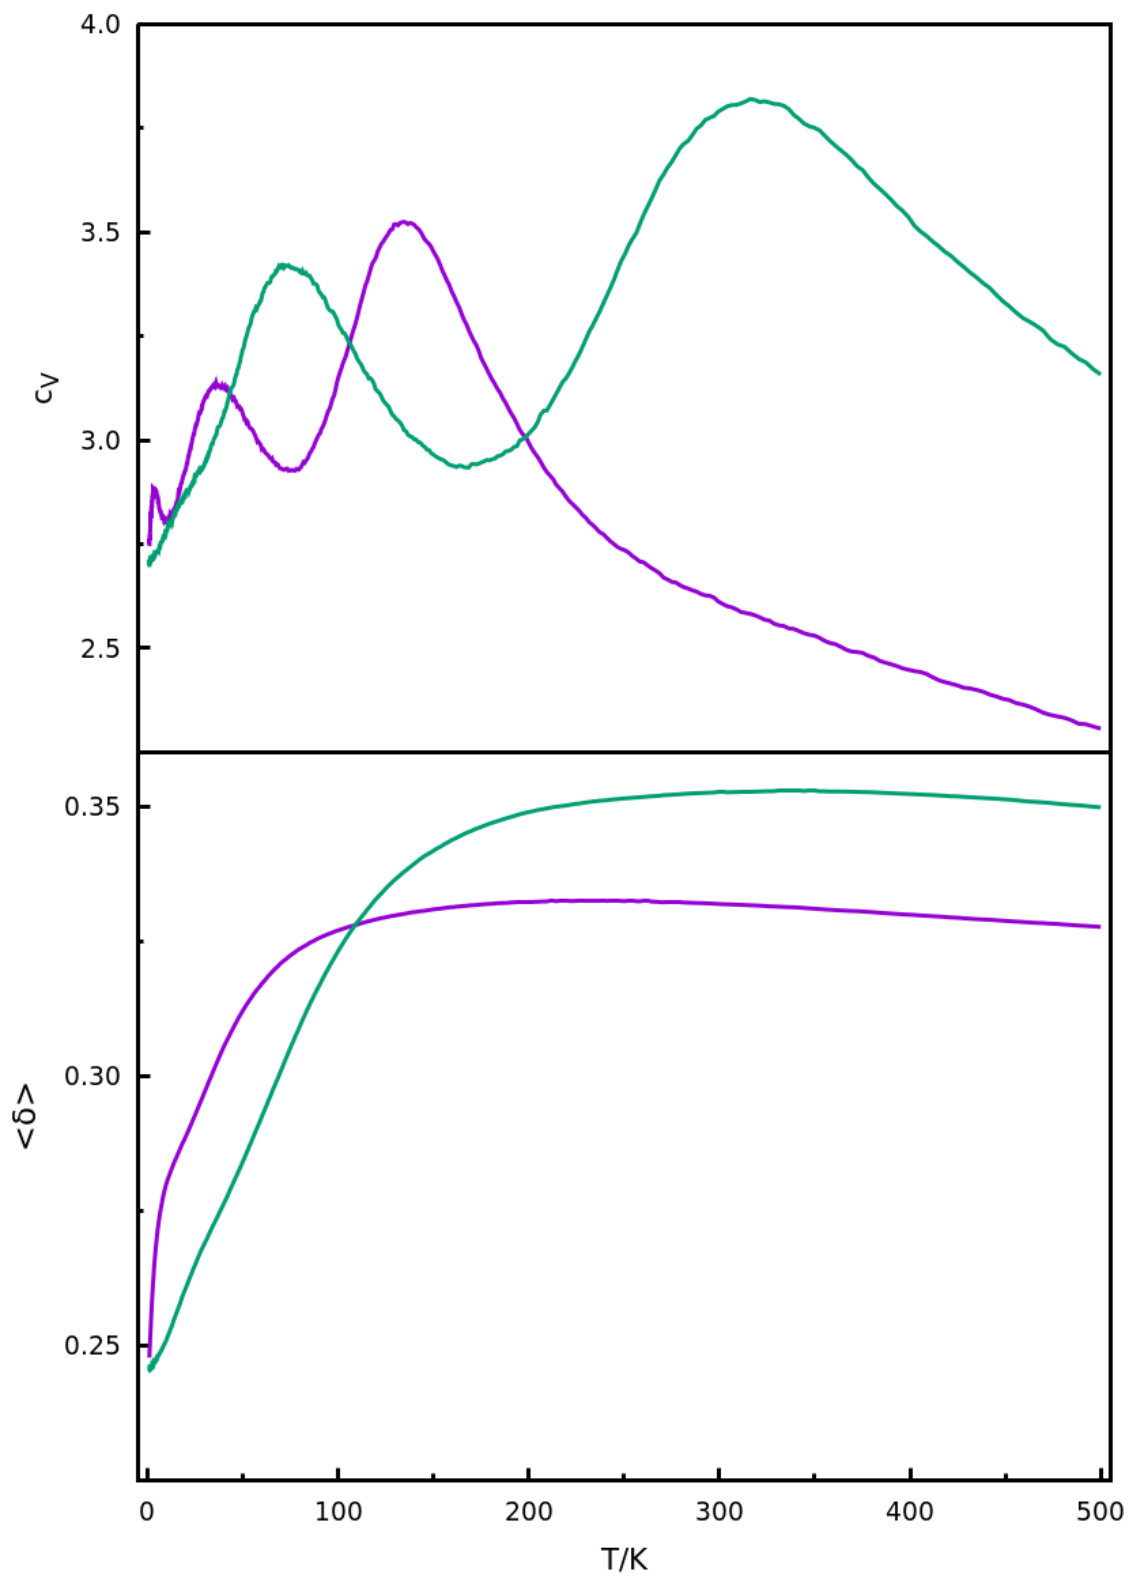

Figure S6:  $\text{Li}^+\text{Ar}_9$  reduced heat capacity and mean Lindemann index modeled with PES I (magenta) and PES II (green).



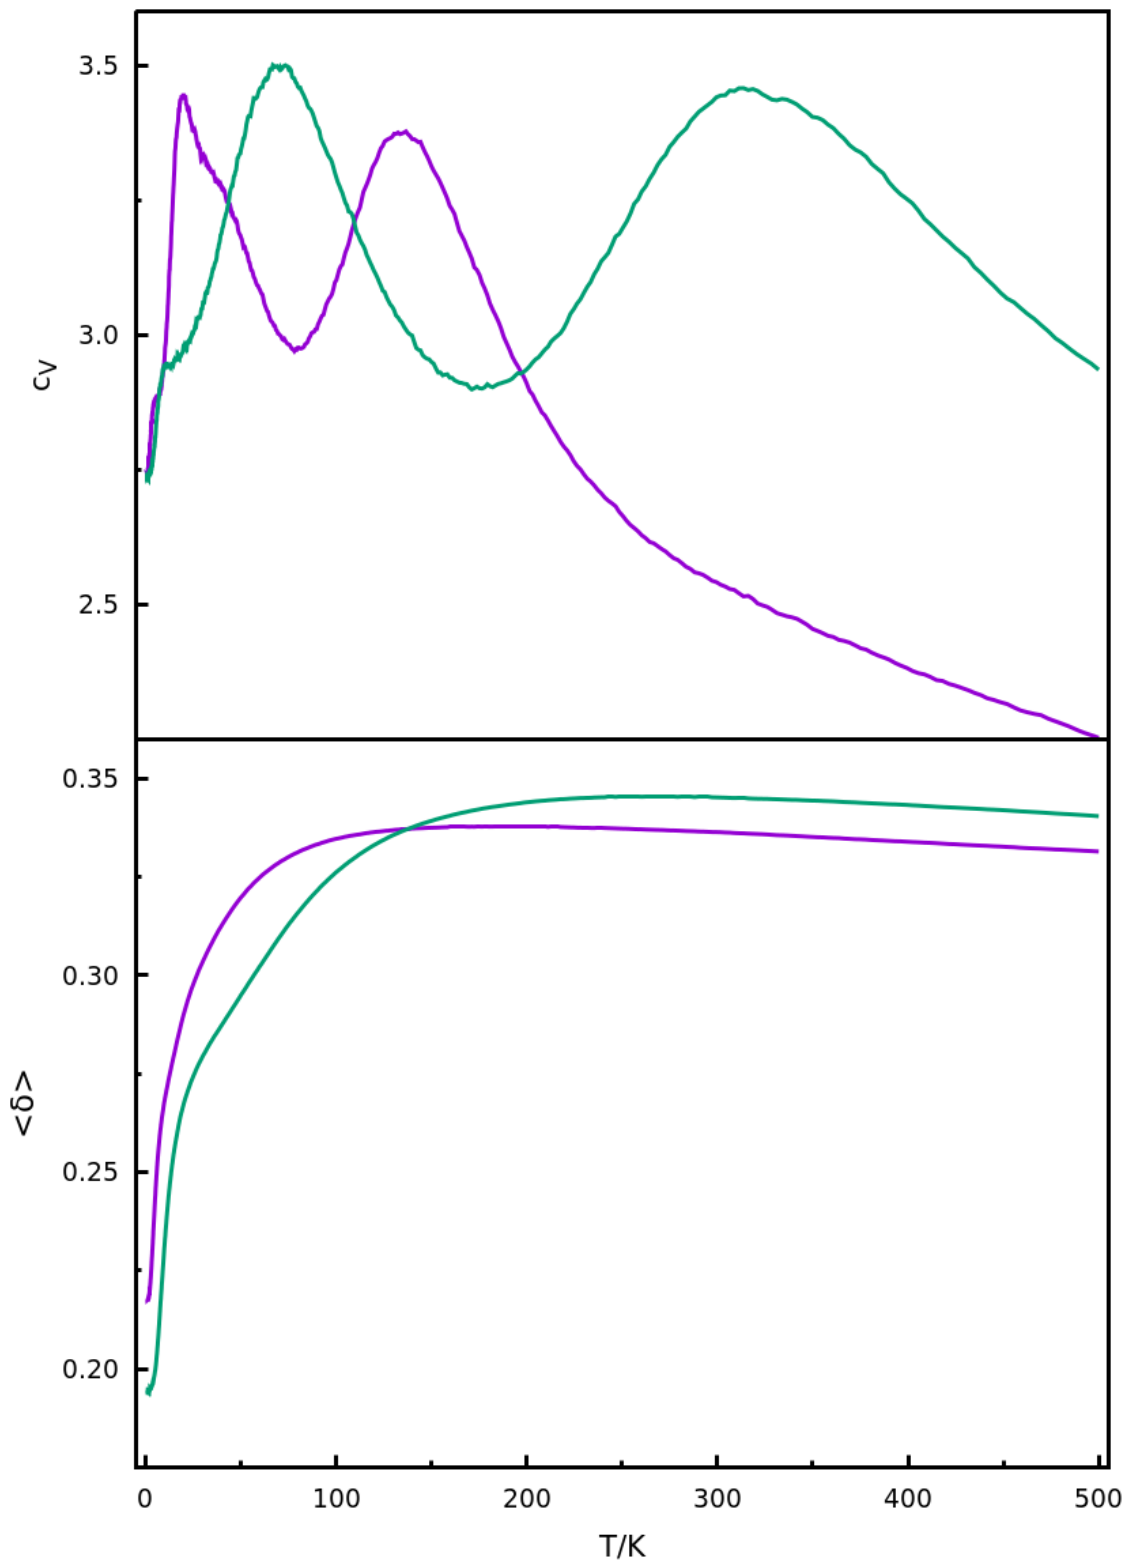

Figure S7:  $\text{Li}^+\text{Ar}_{10}$  reduced heat capacity and mean Lindemann index modeled with PES I (magenta) and PES II (green).

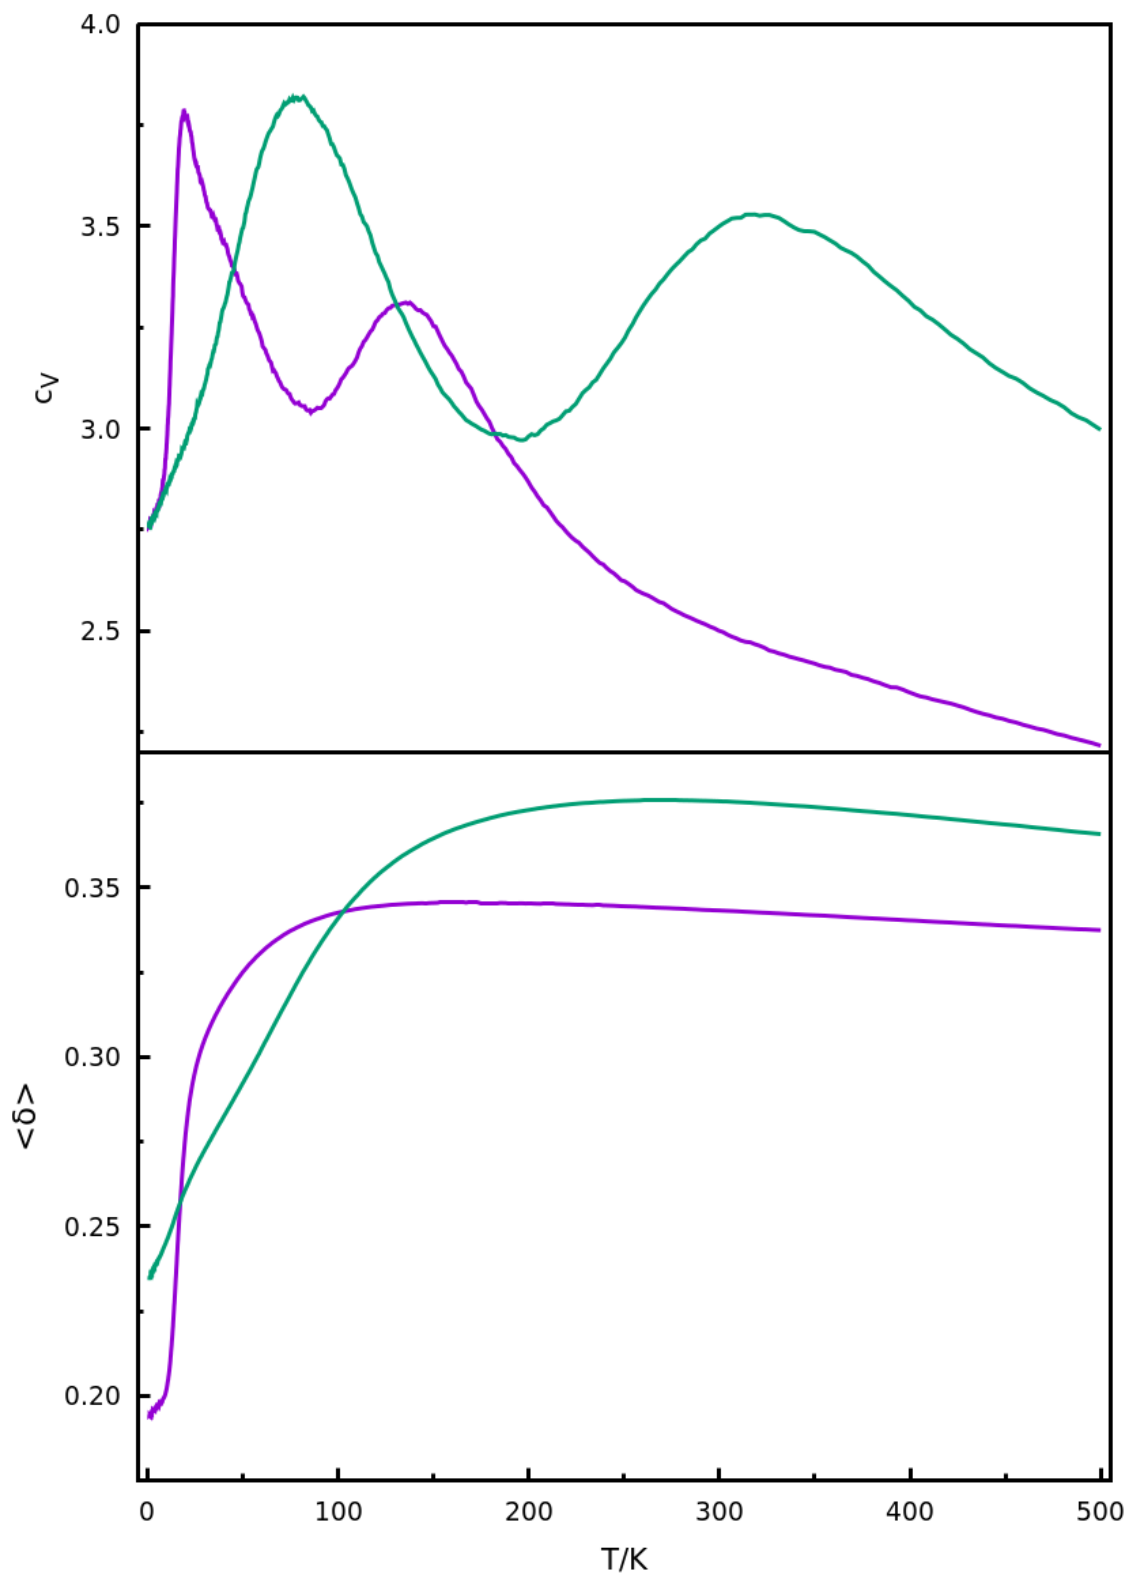

Figure S8:  $\text{Li}^+\text{Ar}_{11}$  reduced heat capacity and mean Lindemann index modeled with PES I (magenta) and PES II (green).

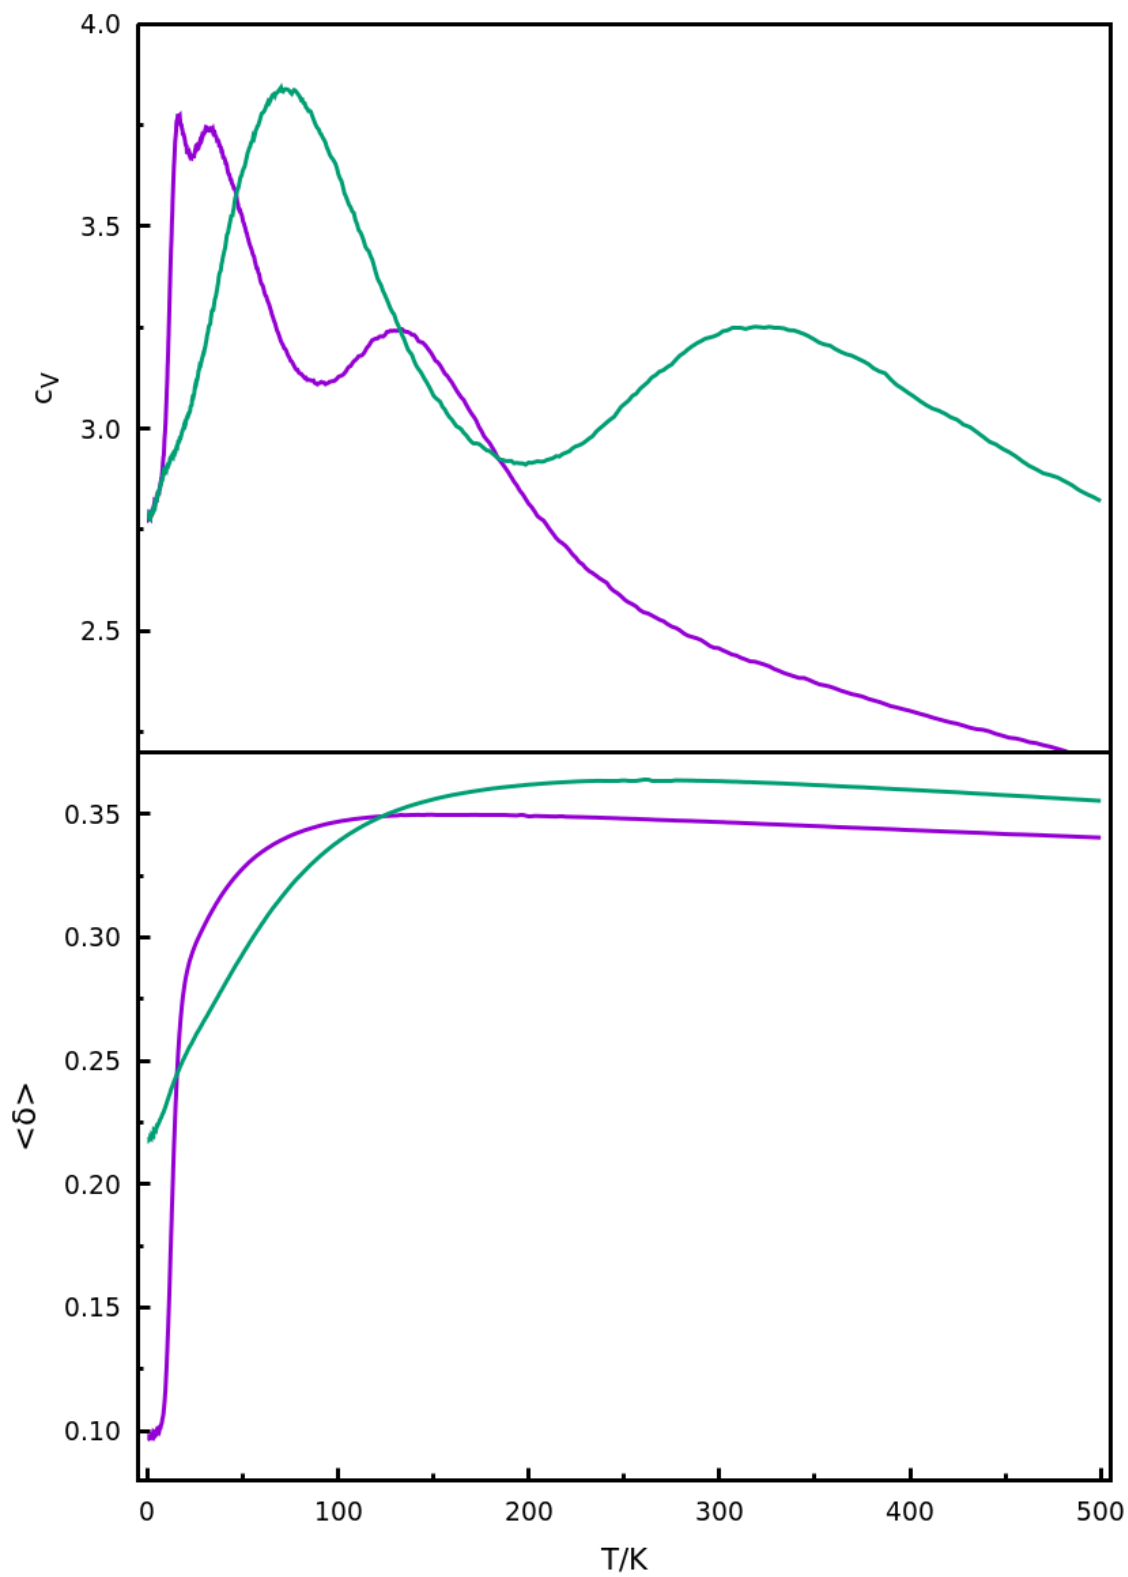

Figure S9:  $\text{Li}^+\text{Ar}_{12}$  reduced heat capacity and mean Lindemann index modeled with PES I (magenta) and PES II (green).

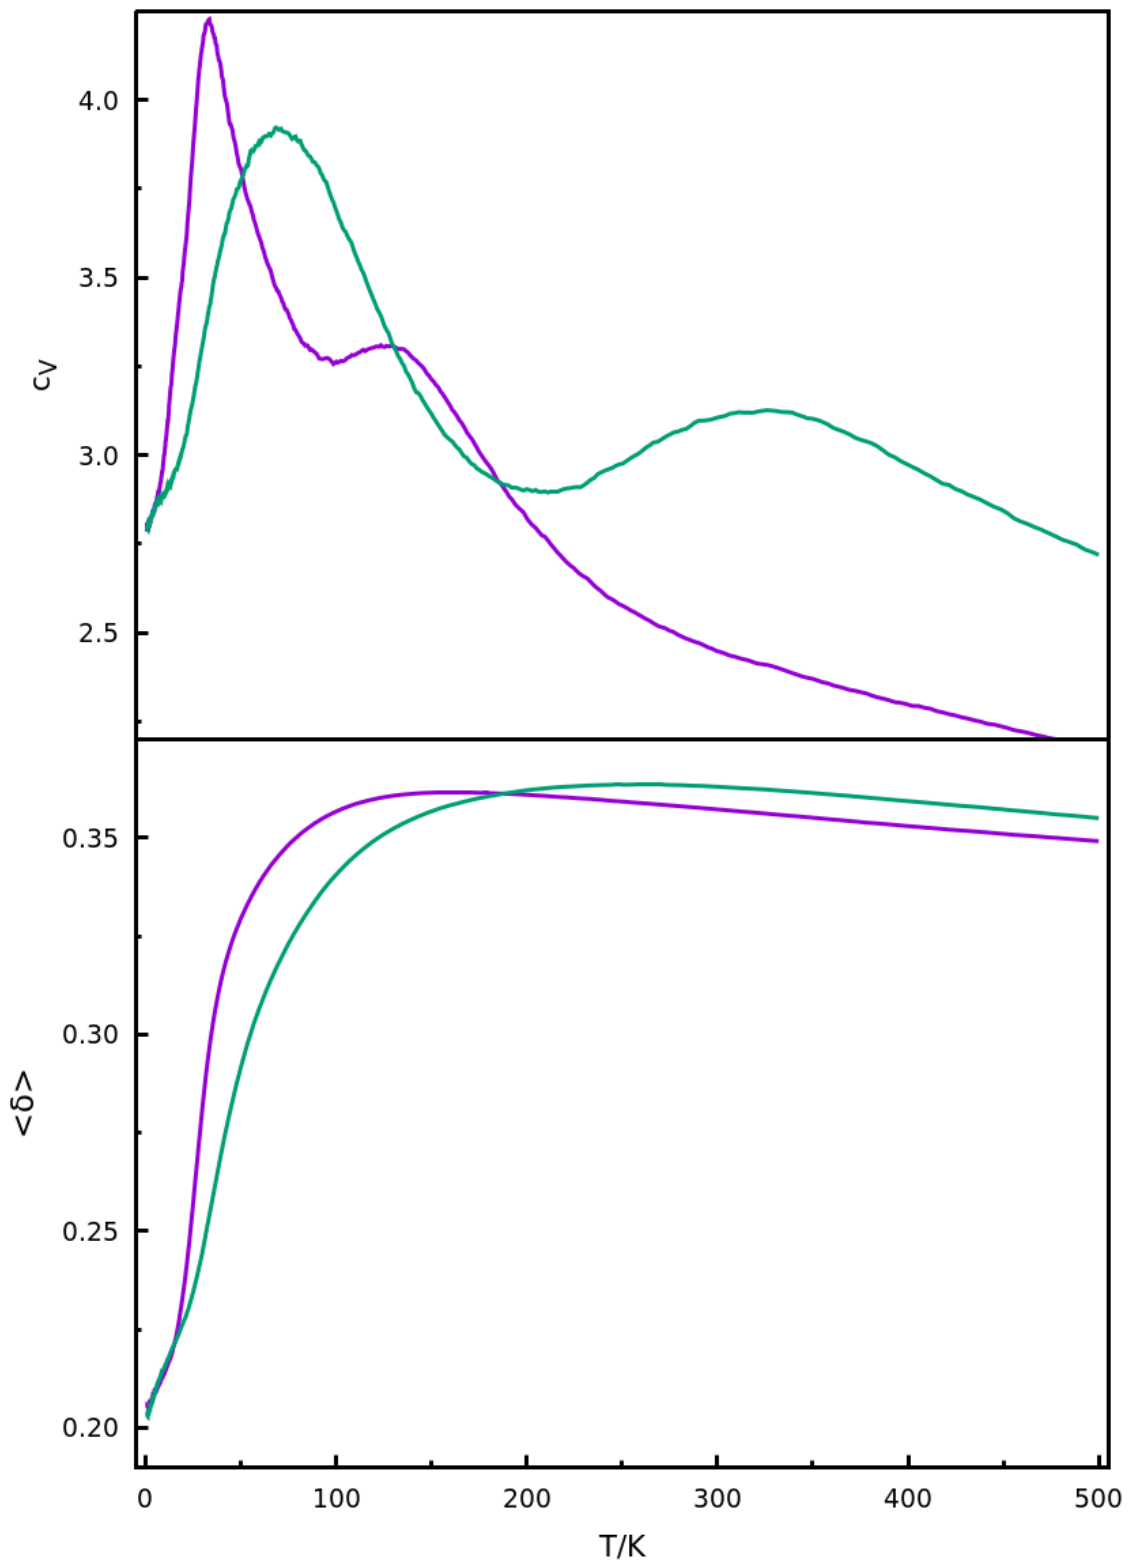

Figure S10:  $\text{Li}^+\text{Ar}_{13}$  reduced heat capacity and mean Lindemann index modeled with PES I (magenta) and PES II (green).

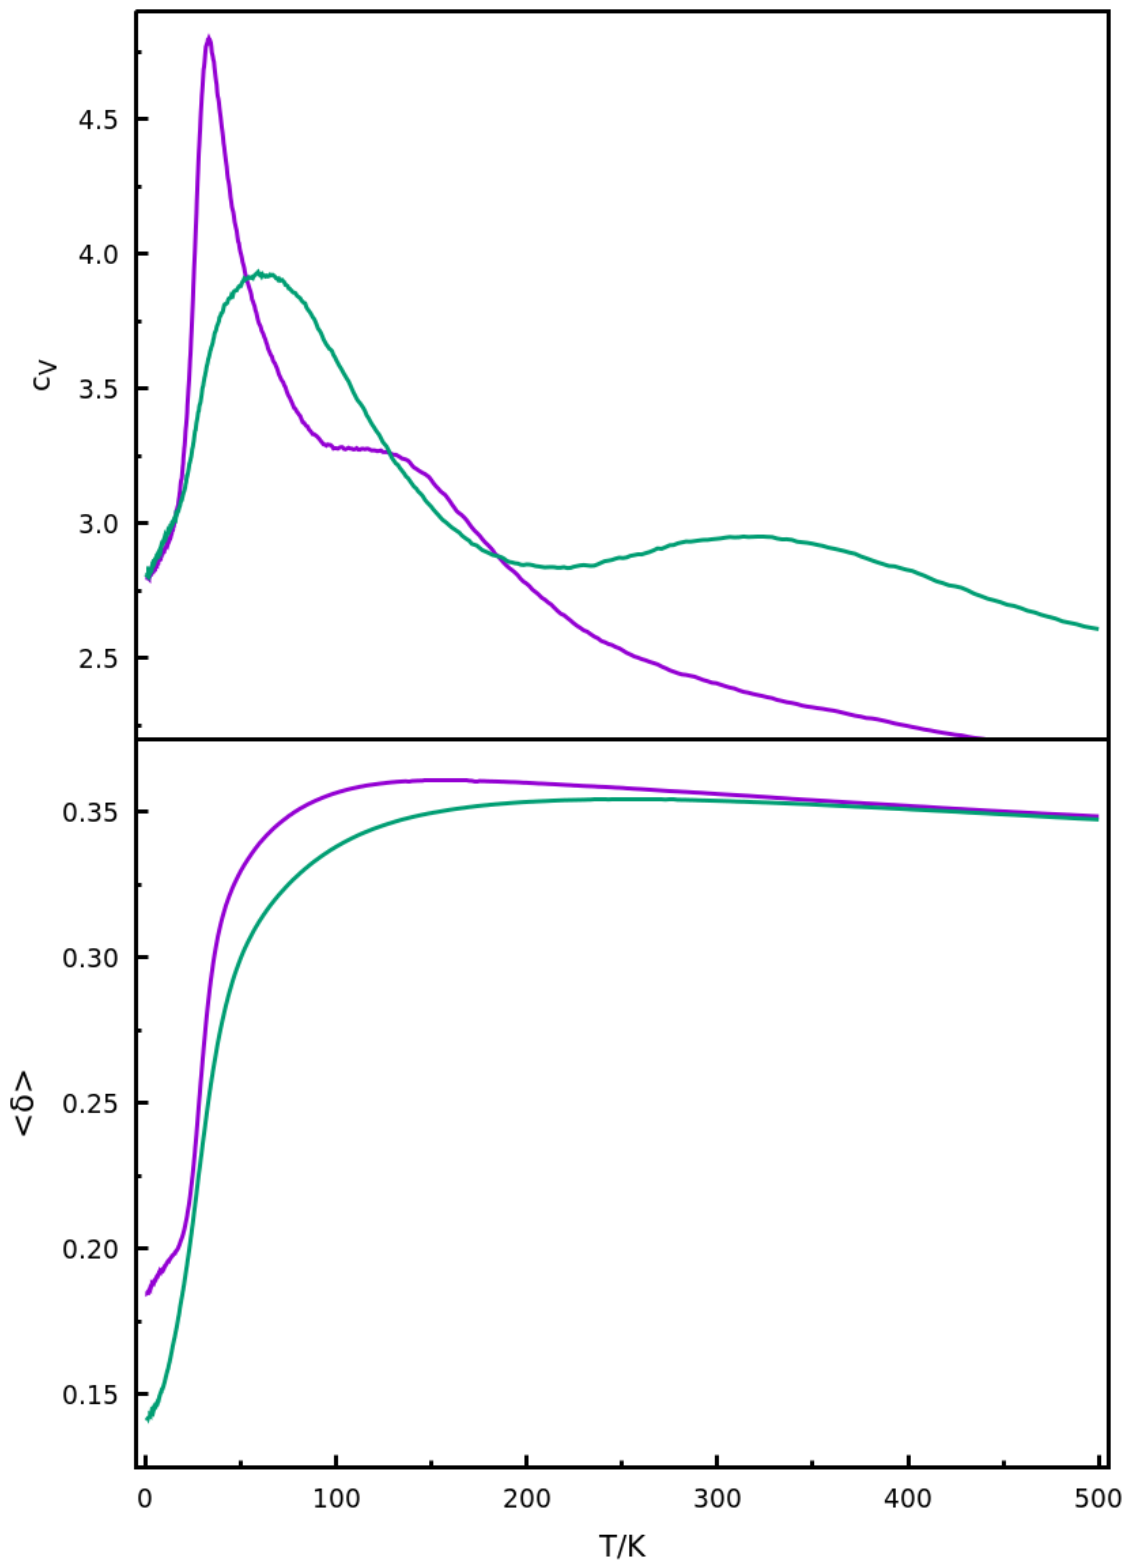

Figure S11:  $\text{Li}^+\text{Ar}_{14}$  reduced heat capacity and mean Lindemann index modeled with PES I (magenta) and PES II (green).

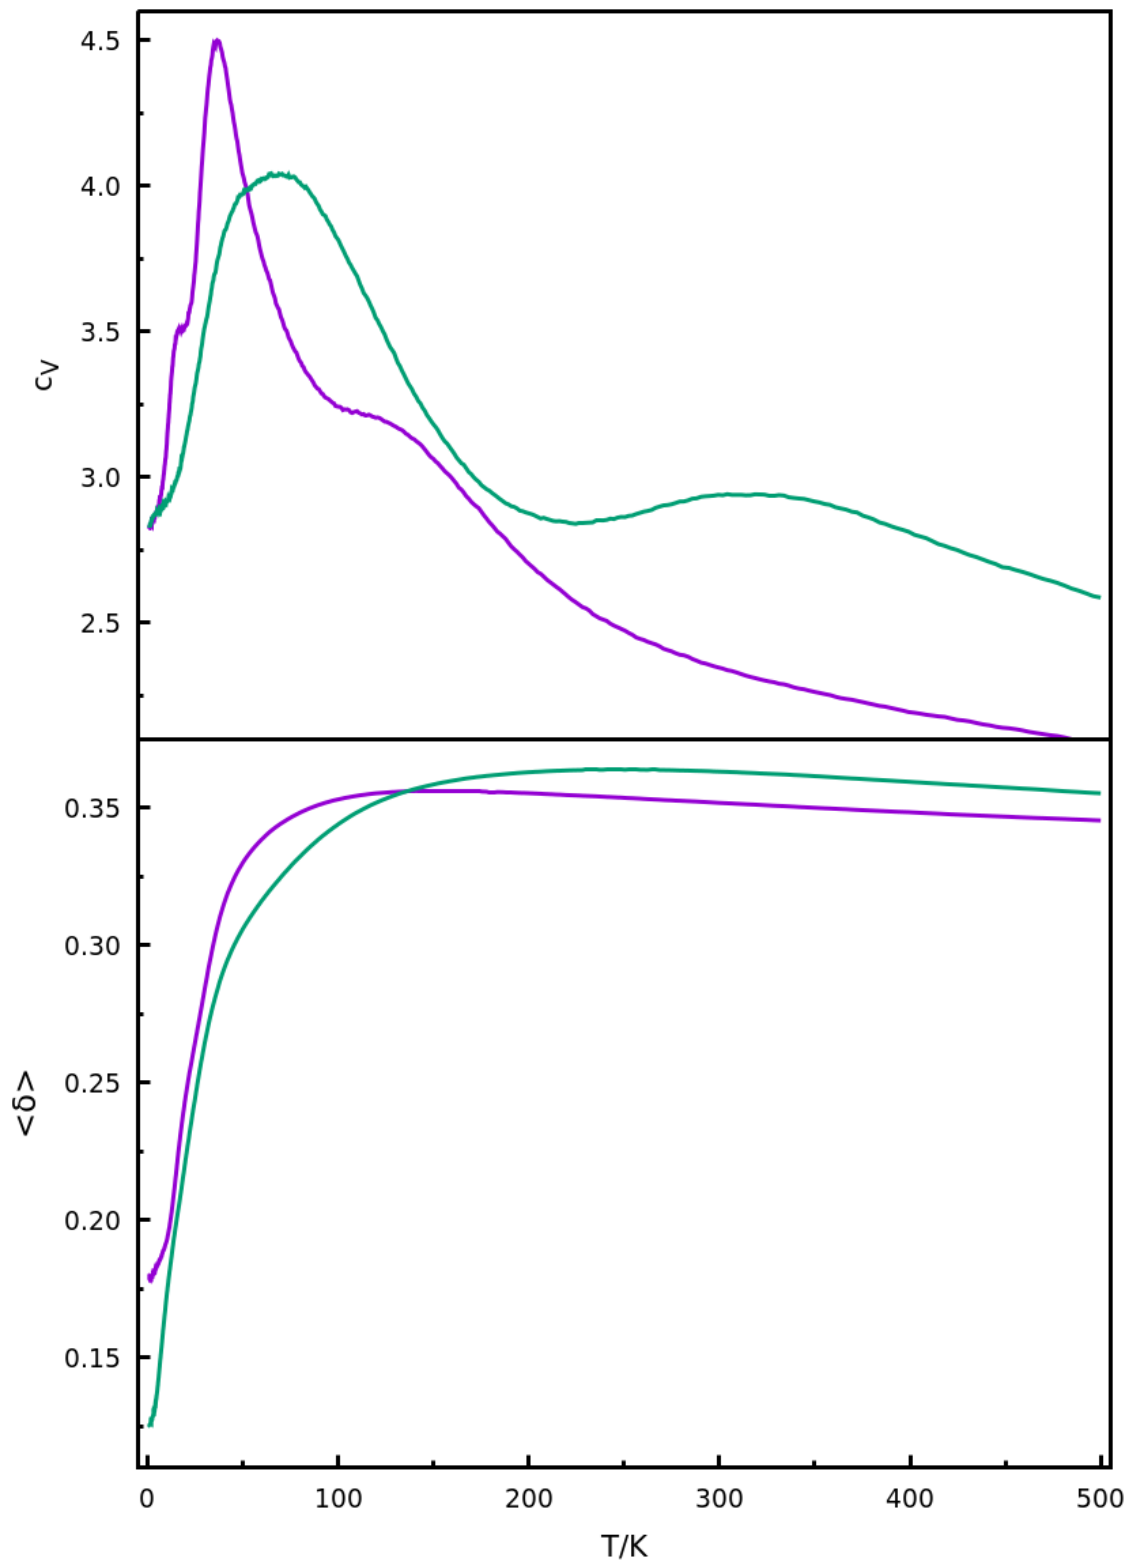

Figure S12:  $\text{Li}^+\text{Ar}_{15}$  reduced heat capacity and mean Lindemann index modeled with PES I (magenta) and PES II (green).

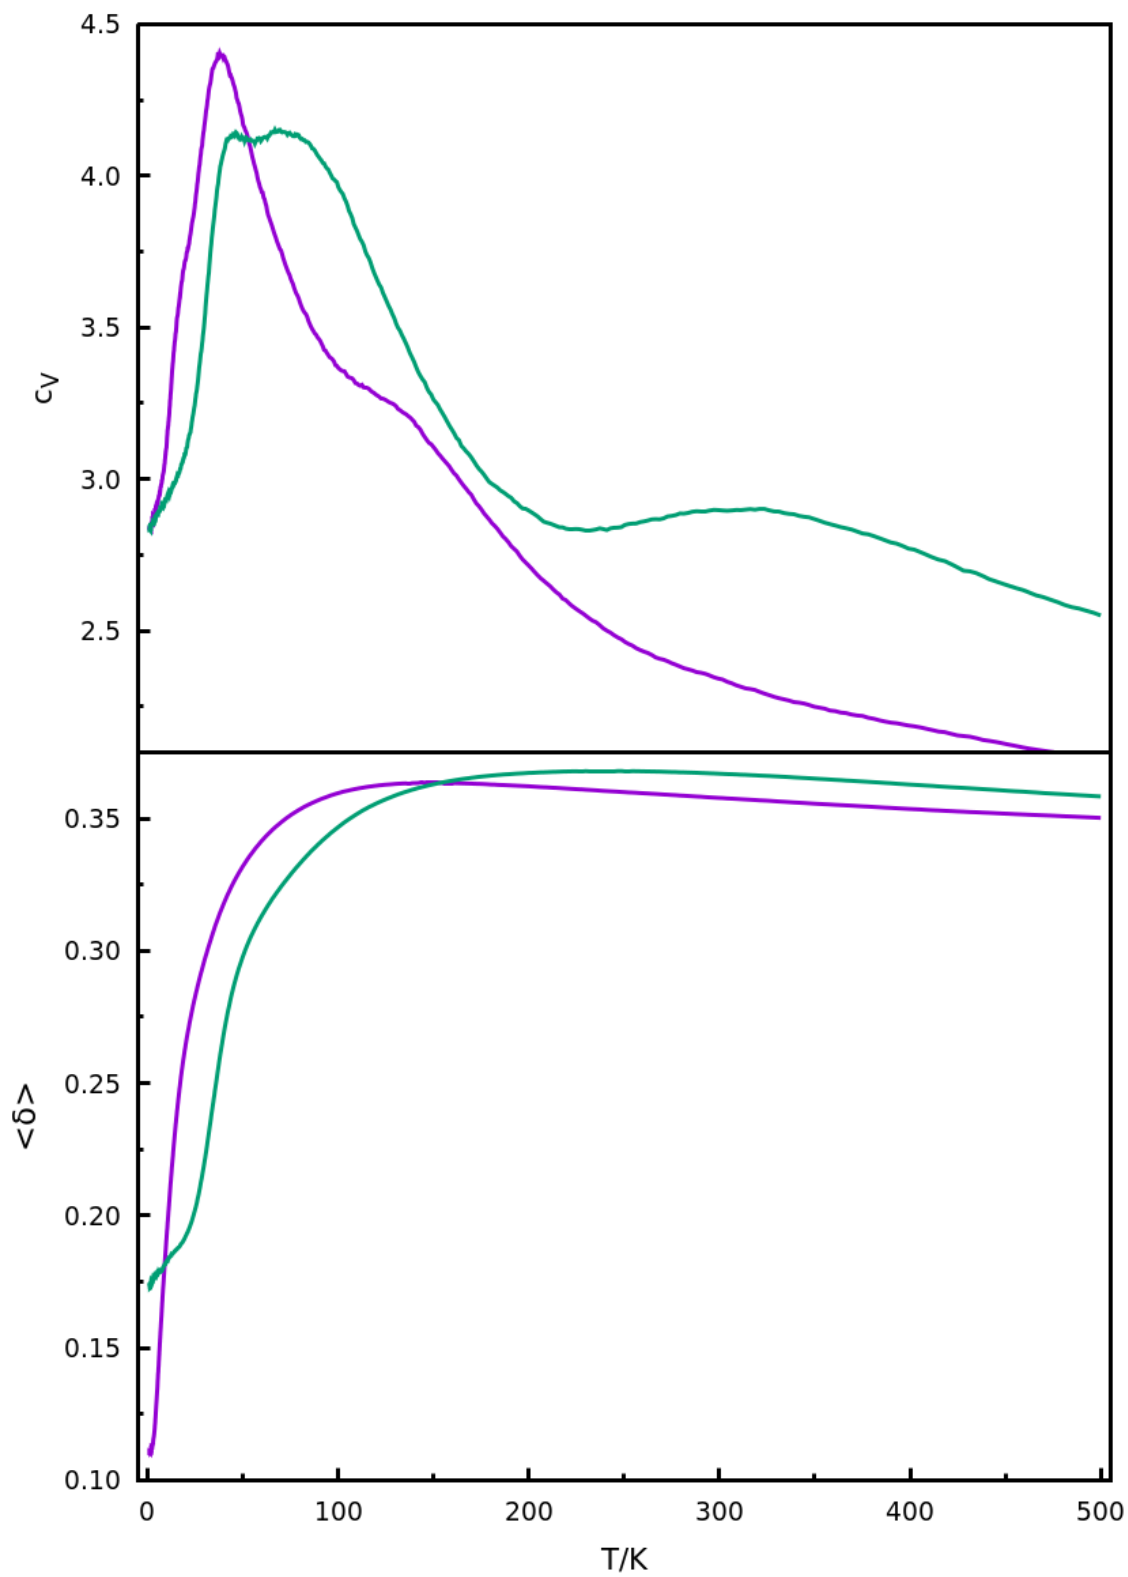

Figure S13:  $\text{Li}^+\text{Ar}_{16}$  reduced heat capacity and mean Lindemann index modeled with PES I (magenta) and PES II (green).

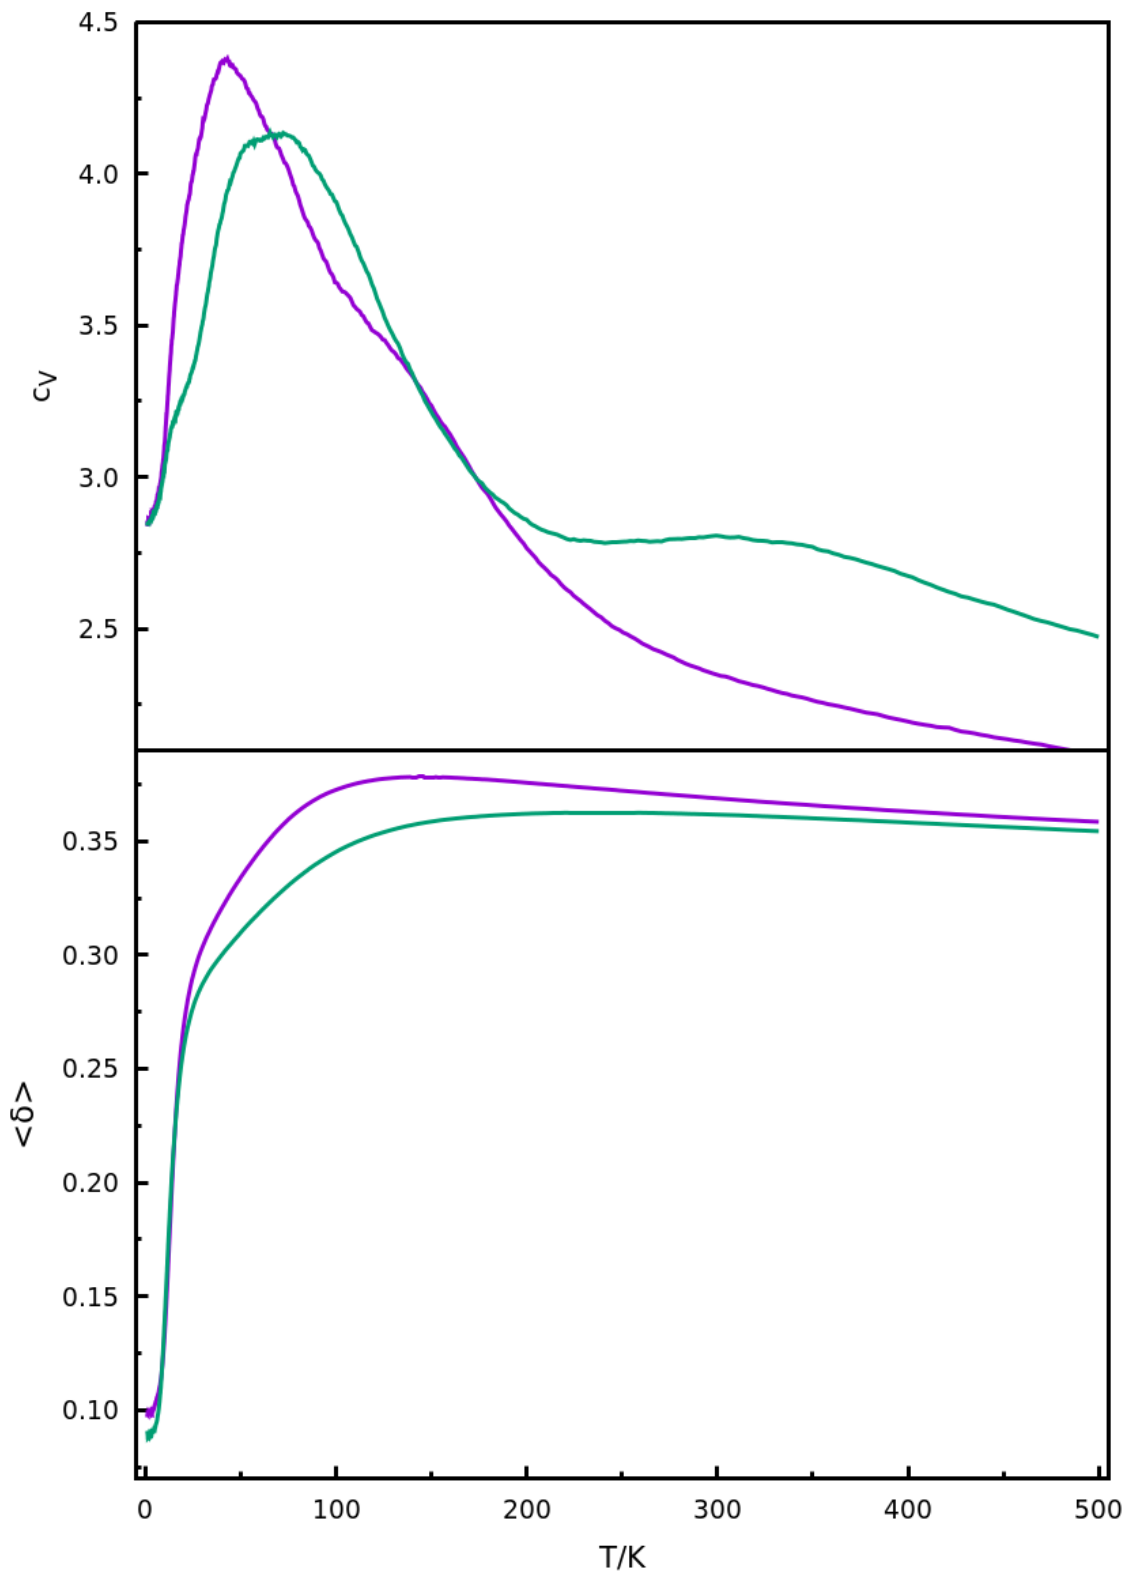

Figure S14:  $\text{Li}^+\text{Ar}_{17}$  reduced heat capacity and mean Lindemann index modeled with PES I (magenta) and PES II (green).



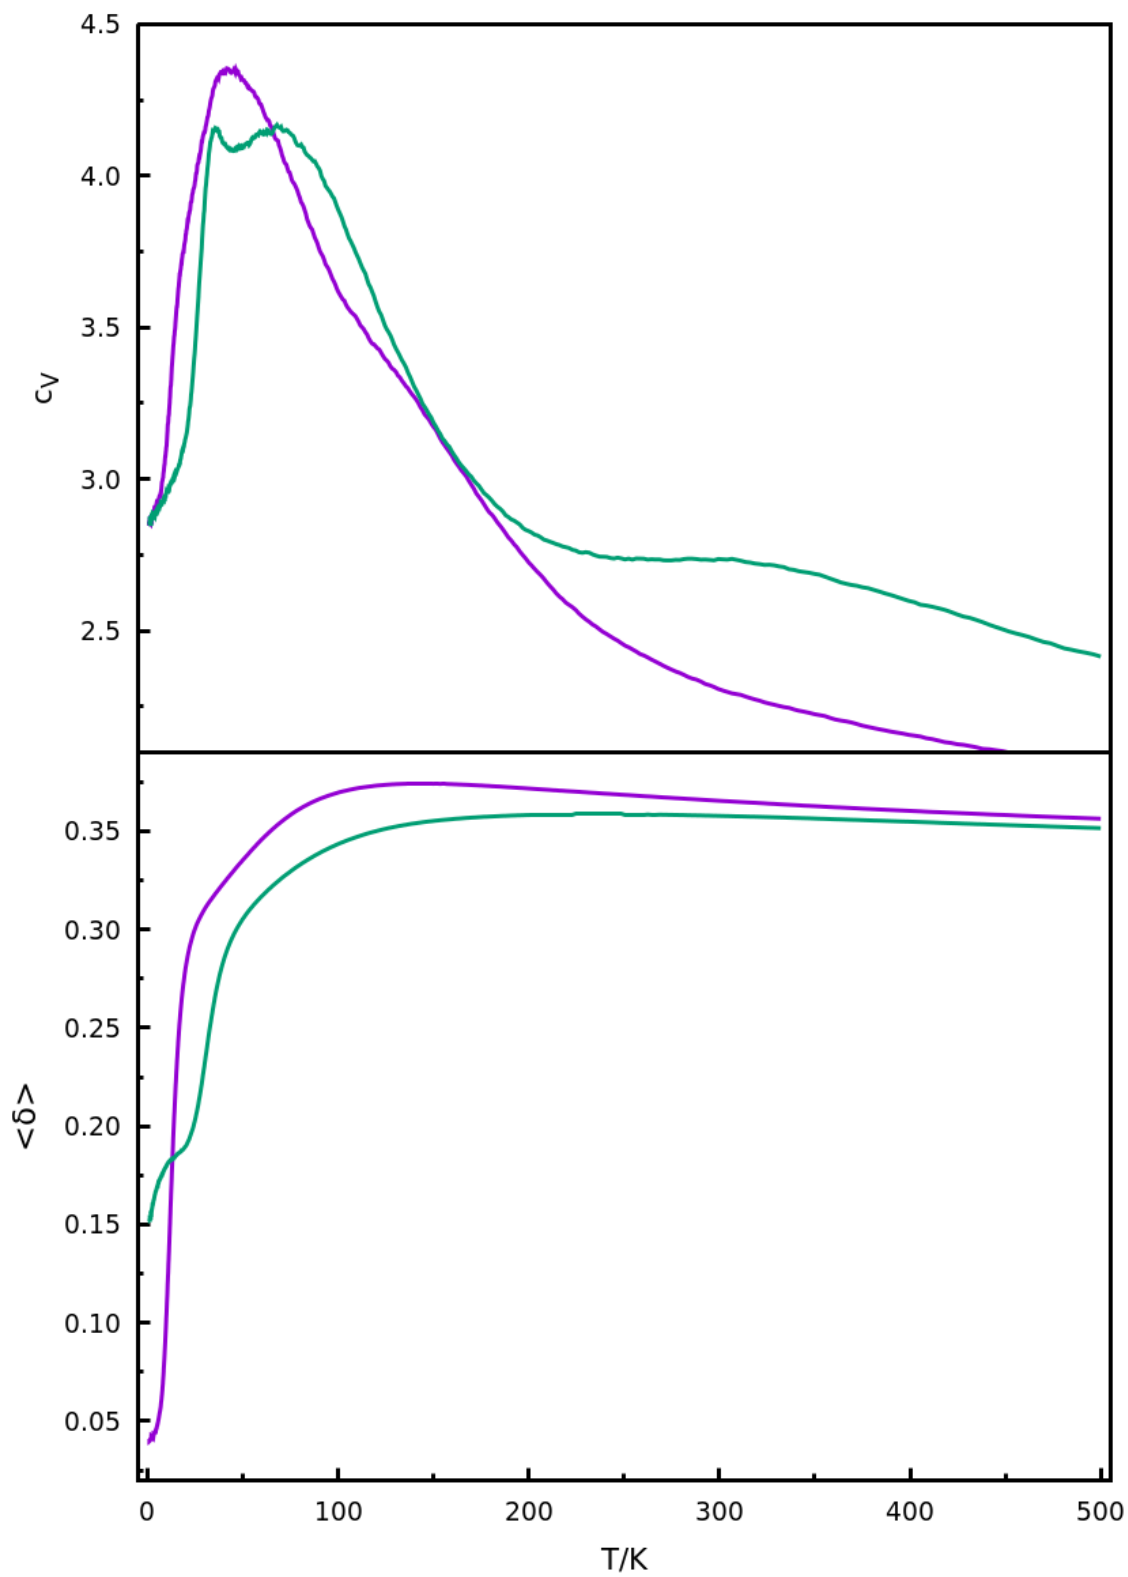

Figure S15:  $\text{Li}^+\text{Ar}_{18}$  reduced heat capacity and mean Lindemann index modeled with PES I (magenta) and PES II (green).

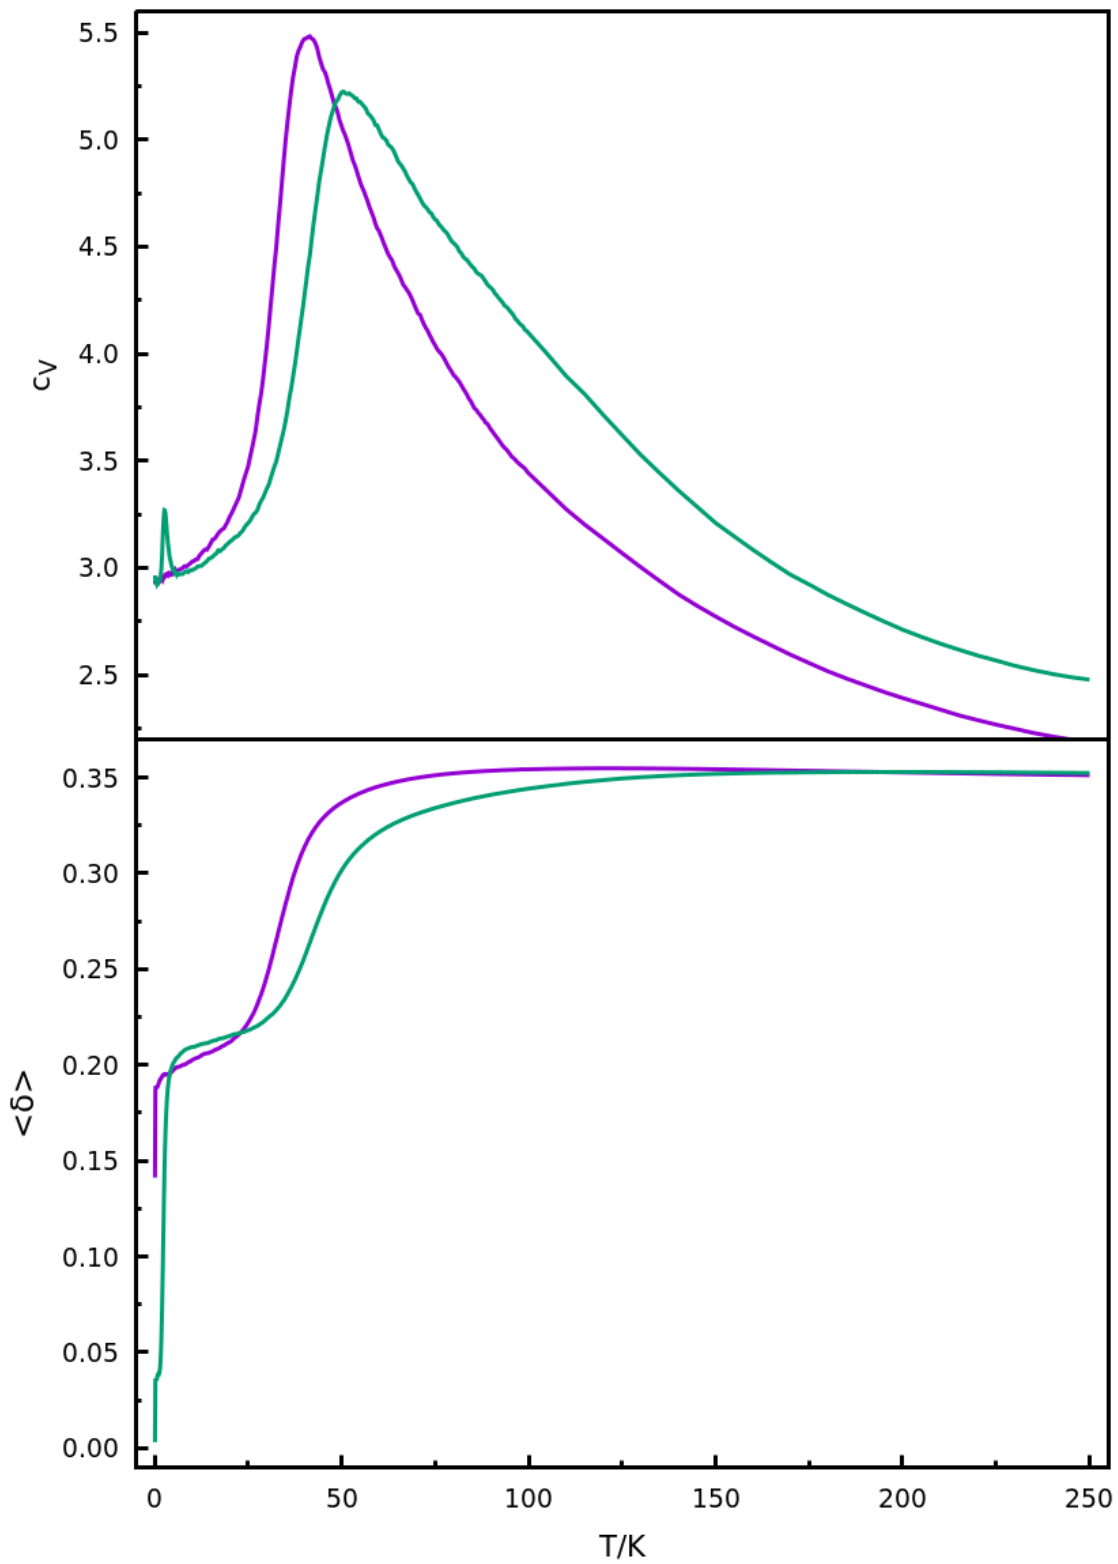

Figure S16:  $\text{Li}^+\text{Ar}_{33}$  reduced heat capacity and mean Lindemann index modeled with PES I (magenta) and PES II (green).

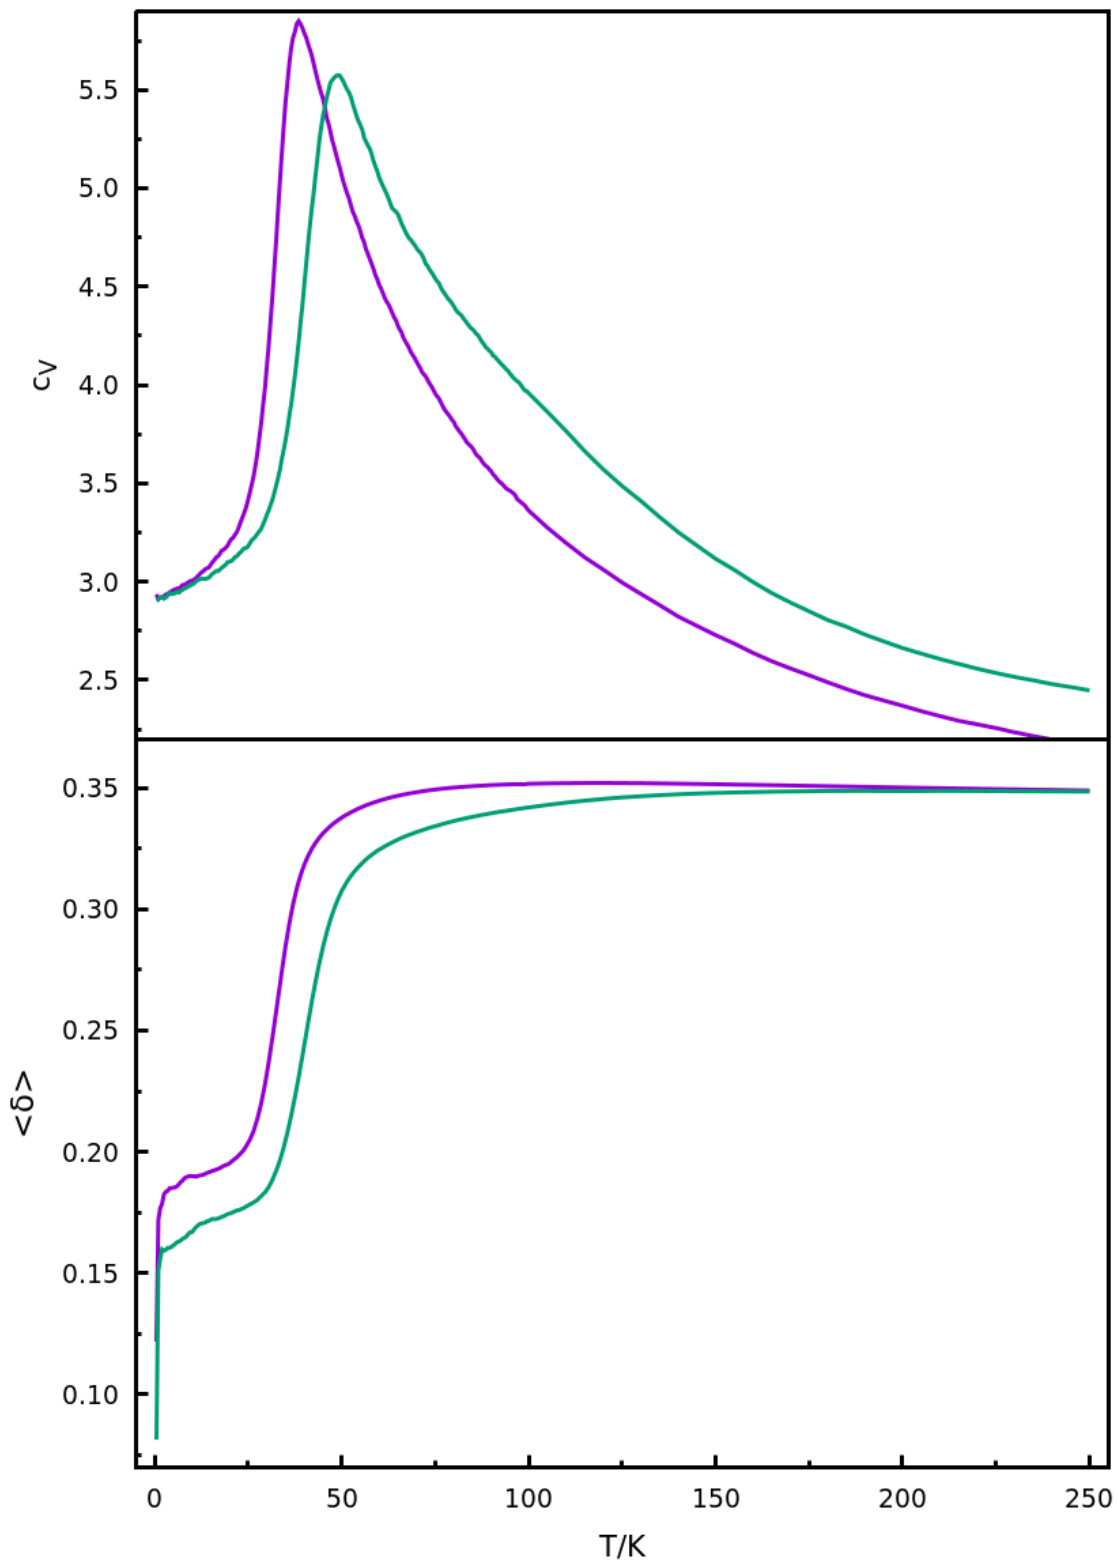

Figure S17:  $\text{Li}^+\text{Ar}_{34}$  reduced heat capacity and mean Lindemann index modeled with PES I (magenta) and PES II (green).

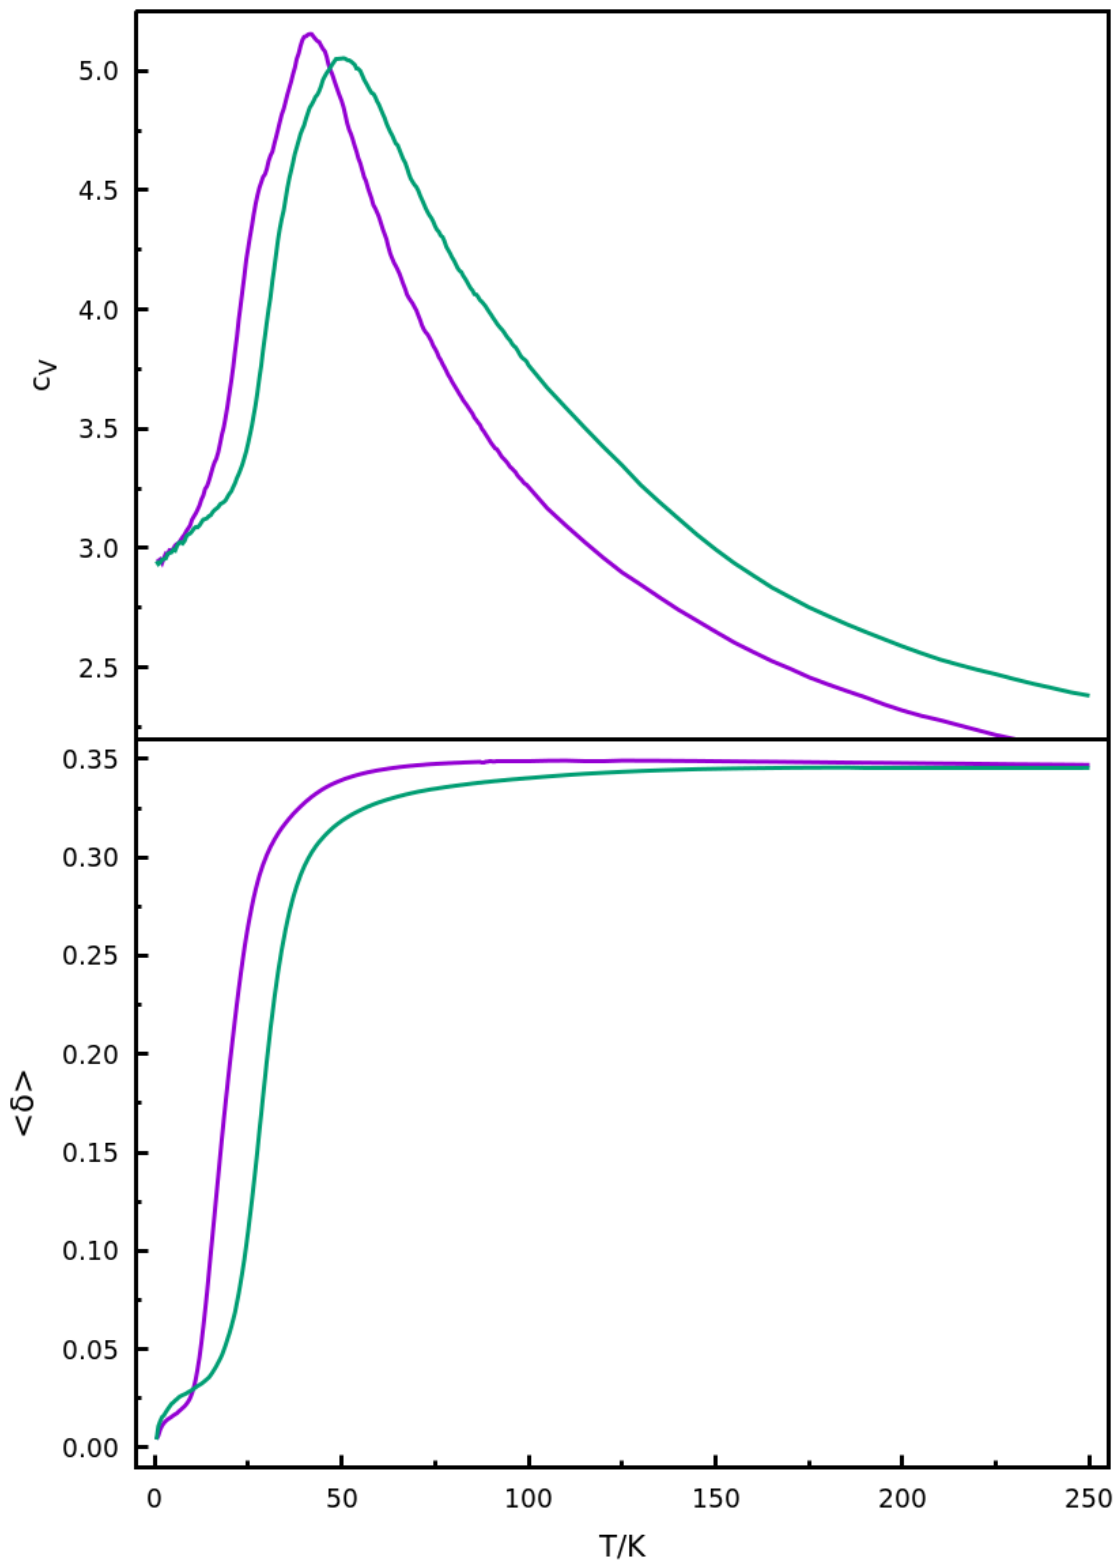

Figure S18:  $\text{Li}^+\text{Ar}_{38}$  reduced heat capacity and mean Lindemann index modeled with PES I (magenta) and PES II (green).

# Cartesian coordinates and energies of the structures displayed in Fig.11

All coordinates are in  $a_0$ , while the energies are in  $E_h$ .

## $\text{Li}^+\text{Ar}_{33}$ cluster of PES I

Structure corresponding to the green curve:

34

Energy=-0.10669443487108157

|    |                    |                    |                    |
|----|--------------------|--------------------|--------------------|
| Ar | 11.382555002573685 | 5.6913650500727622 | 5.7663093877126634 |
| Ar | 6.0815818078196759 | 15.634567772601065 | 18.497530056770398 |
| Ar | 16.133825472382412 | 16.207444590561426 | 11.926233342350434 |
| Ar | 6.0962797554877008 | 10.213906660735553 | 8.2974180402756339 |
| Ar | 10.784093753227676 | 8.3675838993410512 | 13.254596155989971 |
| Ar | 14.126456830988788 | 12.750624935518463 | 17.299915454272323 |
| Ar | 14.199908462742986 | 2.7195185457440334 | 11.668231558463402 |
| Ar | 6.6601427279434073 | 3.5382453214863876 | 10.619629587535394 |
| Ar | 22.835564823812756 | 16.118629436521786 | 12.644884064749354 |
| Ar | 21.293586505896069 | 10.696679693439572 | 17.523246892034980 |
| Ar | 15.771486382427442 | 10.028568806186318 | 1.7926819816331534 |
| Ar | 9.4652420748850457 | 14.923914884795867 | 12.733758237630012 |
| Ar | 9.1229189245755169 | 9.3200852974421231 | 20.387519191379003 |
| Ar | 12.396119909719895 | 21.291430657974775 | 9.5135602811958524 |
| Ar | 17.320968329298374 | 9.5049760397901402 | 12.205299047386392 |
| Ar | 9.0401124631515071 | 11.873928580632104 | 2.0634478687146922 |
| Ar | 18.691198586170824 | 5.8032352820927571 | 6.7640770919112576 |
| Ar | 12.870405265882418 | 11.955954077972320 | 7.7851611843353332 |

|    |                    |                    |                    |
|----|--------------------|--------------------|--------------------|
| Ar | 20.876863182225271 | 3.9094358203784640 | 13.876307761738664 |
| Ar | 11.760941477603822 | 15.830010449521845 | 22.878221637023014 |
| Ar | 24.049325675547706 | 9.3320323375094887 | 10.756395882188361 |
| Ar | 19.756896159791371 | 13.168221486822203 | 6.6540293643690189 |
| Ar | 7.4299421311346006 | 17.099837070134669 | 6.6136313777368398 |
| Ar | 19.442862170732646 | 20.185610425107445 | 7.3520727838675164 |
| Ar | 9.0549814320192503 | 2.9952690730606442 | 17.164665999470941 |
| Ar | 12.320083236282446 | 19.714346287913095 | 16.869733841644820 |
| Ar | 18.950406104272624 | 17.433298461043126 | 18.602876588754910 |
| Ar | 14.158350286199097 | 17.134581058742494 | 3.6875492792736293 |
| Ar | 15.477356649302894 | 5.9480369550869021 | 18.086486108082013 |
| Ar | 18.179309549785167 | 22.524618498259201 | 13.815380197134845 |
| Ar | 6.3307817615072182 | 21.003390173351807 | 13.207730119795297 |
| Ar | 4.3228224915230680 | 9.1198589264590826 | 15.180314873596108 |
| Ar | 2.6134594272070557 | 15.205545694457220 | 11.938281860341622 |
| Li | 13.450868425925089 | 12.284478513648843 | 12.539678975717107 |

## Li<sup>+</sup>Ar<sub>33</sub> cluster of PES II

Structure corresponding to the green curve:

34

Energy=-0.14041354257219510

|    |                    |                    |                          |
|----|--------------------|--------------------|--------------------------|
| Ar | 12.188763241683922 | 7.9592388491002435 | 9.82306440923754950E-003 |
| Ar | 17.702137840548136 | 8.5024359970035643 | 4.0745651313466009       |
| Ar | 9.6057835861735850 | 14.082334361999223 | 2.6706076339111116       |
| Ar | 5.9137892395973708 | 8.3199547728848735 | 2.6930847803894435       |
| Ar | 9.6062864518594253 | 2.7487060723679235 | 4.1828786240669560       |
| Ar | 15.143269091697674 | 3.2938142751625037 | 8.2645922491742621       |

|    |                          |                           |                    |
|----|--------------------------|---------------------------|--------------------|
| Ar | 2.4892810113125425       | 14.251443744217251        | 2.4045466060843070 |
| Ar | 15.142573366898409       | 14.627040259990274        | 6.7531759481506448 |
| Ar | 11.295024874771837       | 8.8825366457919781        | 6.9061155052318108 |
| Ar | 2.4832295820626626       | 2.5246188689381479        | 3.9634206914881096 |
| Ar | 16.913509379865101       | 9.4023490468900057        | 10.803254751375128 |
| Ar | 9.4190170205968915       | 18.272508037720637        | 8.1968966312410867 |
| Ar | 0.21853572733669865      | 8.8236015285969316        | 6.4229409874633481 |
| Ar | 2.3381582291682506       | 18.420156140106577        | 7.8755994203840425 |
| Ar | 9.4134231271090982       | 0.15482894266418129       | 10.624025373780453 |
| Ar | 5.8965407899457851       | 5.8679605396101522        | 9.0969568952075548 |
| Ar | 17.428600140766200       | 3.9948068362208029        | 14.981851975727441 |
| Ar | 2.3257756130176146       | -5.13003260613128162E-002 | 10.342340243775260 |
| Ar | 5.8914240490846206       | 12.358761936457693        | 8.2405039873460861 |
| Ar | 11.141736909365713       | 12.875453376111523        | 12.111572000270529 |
| Ar | 11.149683938204820       | 6.3850061685109241        | 12.970192742741997 |
| Ar | 17.420493718571294       | 15.720774094684959        | 13.413558864523047 |
| Ar | 11.741841244342680       | 19.345828358152232        | 14.808763852943544 |
| Ar | 5.5271549656588848       | 3.1837406931287275        | 15.489599815839490 |
| Ar | 5.5414969405977921       | 16.620821131681456        | 13.676789507490700 |
| Ar | 5.7805407023980271       | 9.8347031317346492        | 14.258231985419407 |
| Ar | 14.946553939226495       | 10.272443351887986        | 17.282125246022911 |
| Ar | 4.15469815276970772E-002 | 6.2181930698083416        | 12.810563581187475 |
| Ar | 4.23415220878206253E-002 | 13.040113963392951        | 11.900911508654149 |
| Ar | 11.744183007062279       | 0.87664183453077915       | 17.287814734721277 |
| Ar | 9.2631857692511002       | 13.947783909646514        | 18.698915064183847 |
| Ar | 9.2626166790395583       | 7.1263390421902661        | 19.610278681129337 |
| Ar | 2.0912599366187608       | 13.194293923018453        | 18.814776963802878 |

Li 8.5403080752019793 9.3688220163603315 10.577416011086894

Structure corresponding to the blue curve:

34

Energy=-0.14035529731798596

|    |                     |                     |                     |
|----|---------------------|---------------------|---------------------|
| Ar | 12.690465863297410  | 9.5858361606692704  | 0.68247891859462362 |
| Ar | 17.617563224725995  | 7.1834940325540781  | 4.8681668594884693  |
| Ar | 9.0217444087712462  | 14.903065496441162  | 3.3607502193596779  |
| Ar | 6.3589520483488338  | 8.4531658048728495  | 3.3743389744651151  |
| Ar | 11.313912304047943  | 3.4856194541858603  | 4.8124620711203683  |
| Ar | 16.095337786873614  | 2.7763328355134242  | 10.090515241344894  |
| Ar | 1.7951881684734035  | 13.721008836827149  | 3.8411819691488005  |
| Ar | 15.746818288615305  | 14.352294643319008  | 5.7269882846605160  |
| Ar | 11.659667633950287  | 9.4741161666237197  | 7.4689935387589088  |
| Ar | 4.5103588717003085  | 1.8747550229209067  | 4.6910153753064616  |
| Ar | 17.298331594349253  | 9.8597553945490901  | 11.234029754892756  |
| Ar | 10.823853575810530  | 18.363257618161992  | 9.0360933397539505  |
| Ar | 0.50556718759972163 | 7.7753716130353308  | 7.1894166896237595  |
| Ar | 3.9740385017484079  | 18.923352031463715  | 7.8063001758494162  |
| Ar | 9.4148054434119590  | 0.23973088145034549 | 10.610404927820131  |
| Ar | 6.4033700167338461  | 6.1175254249789690  | 9.7205046588383102  |
| Ar | 17.572892543526081  | 5.6972400060065675  | 16.774246505073680  |
| Ar | 2.1277193402273116  | 0.91635306769836344 | 11.098471727912170  |
| Ar | 6.2344043463767003  | 12.551873766195836  | 8.9537700187264271  |
| Ar | 11.546805487425454  | 13.074996972787369  | 12.857659271683028  |
| Ar | 11.726588767977505  | 6.5707774138753035  | 13.265038559294307  |
| Ar | 17.332702443719548  | 16.736041828956651  | 12.092723147645623  |
| Ar | 12.264646210651664  | 19.111958339076086  | 16.117744819219926  |



|    |                     |                     |                    |
|----|---------------------|---------------------|--------------------|
| Ar | 6.3384248983211426  | 3.3958372316161749  | 16.091533996879932 |
| Ar | 5.9415375142010687  | 16.804977692497069  | 14.140543712915301 |
| Ar | 6.3712968217775652  | 9.9832781655418419  | 14.983408789847269 |
| Ar | 15.808562589205861  | 12.365719292879144  | 17.858585900844531 |
| Ar | 0.52898021042201271 | 7.0088606367912982  | 14.071510634933816 |
| Ar | 0.23026058043383102 | 13.507259493153310  | 11.494885700501438 |
| Ar | 12.774508672285197  | 0.73881616960411134 | 16.714607287181462 |
| Ar | 9.1257447924919504  | 14.008819231090833  | 19.615633510511930 |
| Ar | 11.020442048670699  | 7.3507251853361781  | 19.761770551421897 |
| Ar | 1.6136330192514790  | 13.205166347186671  | 18.453430953676360 |
| Li | 8.9808083715780445  | 9.6308774334725520  | 11.202516289028273 |

### Li<sup>+</sup>Ar<sub>34</sub> cluster of PES I

Structure corresponding to the green curve:

35

Energy=-0.10937779398554232

|    |                    |                    |                    |
|----|--------------------|--------------------|--------------------|
| Ar | 13.854218193244101 | 9.9520667177857955 | 18.489541992001097 |
| Ar | 2.2262710425533649 | 15.505675232898300 | 14.607656385668232 |
| Ar | 17.810985861446536 | 12.749601941075829 | 13.757610128910144 |
| Ar | 12.607338723920643 | 8.8251911177594344 | 11.938336980304147 |
| Ar | 8.8079679587393223 | 9.7573418809262424 | 22.942771221012663 |
| Ar | 12.122581155628756 | 16.201094048418138 | 4.0221037615214046 |
| Ar | 13.621321541343702 | 16.623635918866725 | 17.393334859400582 |
| Ar | 12.365277292884940 | 15.499942718596342 | 10.834009692579006 |
| Ar | 19.788313159693796 | 6.7770552139696774 | 18.658417485271730 |
| Ar | 16.157390179312095 | 9.2564155575016773 | 24.906667689273934 |
| Ar | 6.5047987290283888 | 16.369650875022732 | 20.883164877880315 |

|    |                    |                    |                    |
|----|--------------------|--------------------|--------------------|
| Ar | 21.016194343534998 | 18.526724957322113 | 15.052353583507980 |
| Ar | 13.374315009039377 | 3.8073463894804913 | 21.487599385186051 |
| Ar | 15.069906784573103 | 4.6440506616724893 | 7.1010200506465129 |
| Ar | 10.808879815504174 | 21.646687839244358 | 8.2359812104704098 |
| Ar | 3.0361987001985646 | 9.9175848701350819 | 18.762164685134206 |
| Ar | 7.9617186684668617 | 19.707866378851936 | 14.458589054163202 |
| Ar | 19.351116368947238 | 13.906620109738858 | 20.575418051661167 |
| Ar | 8.4114430981872399 | 12.712900323821430 | 15.560037292544576 |
| Ar | 13.046663992573924 | 15.608337910821202 | 24.024616988152051 |
| Ar | 17.719214137509187 | 20.817544987965409 | 20.942982082071893 |
| Ar | 8.4245212801327405 | 5.7327084497434440 | 16.756961921002965 |
| Ar | 24.220262603605029 | 11.640186054439313 | 15.915730112368358 |
| Ar | 14.970206953051612 | 3.0985558681443686 | 14.576576669517630 |
| Ar | 20.278912689980828 | 6.9506079625403929 | 11.382521436480852 |
| Ar | 8.8229030770645682 | 3.4350801436829750 | 10.041046430430413 |
| Ar | 10.826380112033272 | 22.027983545887775 | 20.544377736126997 |
| Ar | 14.861637692538753 | 22.339114954499340 | 14.058102482888708 |
| Ar | 16.710732709137421 | 11.561400160457319 | 6.8520720507971644 |
| Ar | 17.823753059566538 | 18.672067189933315 | 8.4910135211802729 |
| Ar | 22.967381643872365 | 13.816918235794731 | 9.3718893280796252 |
| Ar | 9.5756254235213021 | 9.8496220910655676 | 6.0132949580156332 |
| Ar | 6.0232693859917790 | 15.684304799263343 | 8.5790626287058664 |
| Ar | 4.6456974357182483 | 9.0625525578681803 | 11.339861144219446 |
| Li | 13.111827466605826 | 12.727258741564770 | 14.662297589257115 |

Structure corresponding to the blue curve:

35

Energy=-0.10896789303938988

|    |                      |                    |                    |
|----|----------------------|--------------------|--------------------|
| Ar | -3.8708709030352697  | 25.350716008061415 | 14.241654706666630 |
| Ar | 5.5698804523132308   | 17.326283237064814 | 5.8735123452498463 |
| Ar | 9.2335323338560205   | 23.062273178015946 | 12.080518168704002 |
| Ar | -0.17429991459010805 | 14.113415561567475 | 9.4556660041057832 |
| Ar | 15.923018219344918   | 16.395270666526770 | 15.892483210091166 |
| Ar | 0.41364922023320344  | 31.235617477408368 | 14.710397654700319 |
| Ar | 9.3880482226916122   | 18.580512551779631 | 17.193614626795192 |
| Ar | 2.7804445660234967   | 24.559772394638561 | 13.630521859791894 |
| Ar | 6.0845805972401132   | 14.749916596098354 | 22.196902718585044 |
| Ar | 8.7978865483553790   | 21.061010753249960 | 23.813645121994170 |
| Ar | 2.5018910052728631   | 13.003686231404187 | 16.393569255689318 |
| Ar | 11.222524211335623   | 16.388223083738929 | 10.770047599608183 |
| Ar | -3.6895634958458903  | 21.978861659788222 | 20.614776406048975 |
| Ar | 1.1260791990960362   | 26.921087798117895 | 20.078772117556785 |
| Ar | 5.5241767665063124   | 24.564284467445791 | 6.6003167654995192 |
| Ar | 6.4690632268393262   | 31.768708927230087 | 18.460563400393202 |
| Ar | -0.18897950911649389 | 28.196890057532659 | 8.5120496424800898 |
| Ar | 12.826523271217470   | 28.411872936147692 | 15.016540265824560 |
| Ar | 3.0565705444177578   | 20.169526870334163 | 18.841245138644894 |
| Ar | 14.449213839012387   | 22.699368021969264 | 19.120216070083540 |
| Ar | 6.2268422052760073   | 11.580972896195204 | 10.447095083475872 |
| Ar | 1.8422884044036549   | 21.871272971601144 | 25.290705503229457 |
| Ar | 11.719538557481462   | 21.108814822987519 | 5.7450096068184235 |
| Ar | 13.126058798888680   | 15.693150216786790 | 22.221372602284124 |
| Ar | 12.371716358524122   | 27.656593912287352 | 7.9768960400610878 |
| Ar | -2.1881145667282573  | 18.321304657835835 | 14.794498500522012 |
| Ar | 4.5623843548981435   | 18.157148253337230 | 12.473995314141197 |

|    |                      |                    |                    |
|----|----------------------|--------------------|--------------------|
| Ar | 6.6547101693654547   | 29.789999289275066 | 11.545702164270816 |
| Ar | 6.4052673089136904   | 27.699192936927023 | 24.618550377381407 |
| Ar | -0.99767777298574534 | 15.673625026102888 | 22.016832337347189 |
| Ar | 7.7121542229732496   | 25.116264531437228 | 18.320601523299953 |
| Ar | 9.9083022975408337   | 11.904847993422308 | 16.585369546315718 |
| Ar | 15.896308534225856   | 22.309057079208110 | 11.843503156908735 |
| Ar | -0.44401748065629532 | 21.115323197102725 | 8.4643050797966257 |
| Li | 6.1173696299904634   | 21.606867592633169 | 15.427001022075050 |

## Li<sup>+</sup>Ar<sub>34</sub> cluster of PES II

Structure corresponding to the green curve:

35

Energy=-0.14344391599442957

|    |                     |                    |                    |
|----|---------------------|--------------------|--------------------|
| Ar | 17.630742187453023  | 6.4505313800336292 | 9.9762366574871137 |
| Ar | 8.5561629487759134  | 19.630435410265058 | 11.560260061630299 |
| Ar | 16.617832469394298  | 8.0353659885038535 | 2.5675410389956719 |
| Ar | 6.3552521800231982  | 6.4477519078086587 | 10.681776949928434 |
| Ar | 2.2566824506815699  | 6.4599469338277018 | 15.841069079614973 |
| Ar | 0.54857598672281815 | 3.0400856403137602 | 9.4038973121965892 |
| Ar | 11.487623147961484  | 14.014856670758324 | 9.7474779900788668 |
| Ar | 17.298418199658773  | 11.976191836664691 | 14.352837298194657 |
| Ar | 17.550829978626467  | 13.007068110357993 | 7.3754227048444116 |
| Ar | 0.45586673776840392 | 13.863355849749576 | 4.0786902352451397 |
| Ar | 11.911030172244782  | 13.155277689957549 | 3.0151760343111742 |
| Ar | 14.215422493171983  | 2.0347273179991032 | 4.9859967392477094 |
| Ar | 2.1990768260363400  | 16.939458383001718 | 10.095514275440427 |
| Ar | 16.136287427198187  | 4.7546613042448307 | 16.578559572957747 |

|    |                           |                     |                      |
|----|---------------------------|---------------------|----------------------|
| Ar | 6.5159292833833318        | 10.830334821278919  | 19.386737379461948   |
| Ar | 0.60775623660441547       | 9.9932598533247532  | 9.8726450151568059   |
| Ar | 5.5468160076857531        | 0.10669049546937058 | 13.151015934658368   |
| Ar | 4.8739589068179772        | 17.801316078938630  | 17.199426295997444   |
| Ar | 11.471484449602379        | 8.9472289746848119  | 13.815458040066886   |
| Ar | 9.3413261735416526        | 6.7066976999828380  | 1.3979069681422251   |
| Ar | 11.867388148008130        | 2.5556641908604716  | 11.527179672684449   |
| Ar | 6.0859964648166001        | 12.500771251358669  | 13.028046401176397   |
| Ar | 13.686112470782788        | 19.244991732362962  | 5.9022622882723157   |
| Ar | 11.757308817570397        | 7.9592905659332605  | 7.3988491166268000   |
| Ar | 13.354809037145875        | 9.8231420306819910  | 20.346151204055992   |
| Ar | 5.7358801758709550        | 12.479742328039112  | -0.14445142725230342 |
| Ar | 6.9144926414367838        | 17.862281780037581  | 4.9292337743747332   |
| Ar | 6.3753131603075337        | 11.514331221601372  | 6.6102272773206394   |
| Ar | -1.36892234065324921E-002 | 13.054462524461263  | 16.102781691526815   |
| Ar | 15.911056579755368        | 18.530107512471059  | 12.395691436582281   |
| Ar | 7.3256932007273248        | 1.8310601134743540  | 6.0827848690248754   |
| Ar | 11.302392566229889        | 15.217789127099143  | 16.439832591636723   |
| Ar | 8.7388673142050521        | 4.3572821584086867  | 17.672542332745355   |
| Ar | 2.7421576523135314        | 6.7320756223898046  | 3.9019028645149239   |
| Li | 8.9222590299431914        | 10.230591831047558  | 10.213579380048829   |

Structure corresponding to the blue curve:

35

E=-0.14290411470624309

|    |                     |                    |                     |
|----|---------------------|--------------------|---------------------|
| Ar | 4.4155991126277838  | 7.9240926986228137 | -2.1657985705174436 |
| Ar | 7.6607933299488389  | 10.676535410327944 | 14.991442757390910  |
| Ar | -4.5695556683984604 | 17.633244392152587 | 8.4236742265538336  |

|    |                      |                    |                     |
|----|----------------------|--------------------|---------------------|
| Ar | 3.8104483430729608   | 9.8845029050606517 | 4.6258878556470817  |
| Ar | 1.7421780946306509   | 13.076407571923523 | 17.639049625515611  |
| Ar | -0.20841438959672676 | 5.5786987941629649 | 8.3614667809200771  |
| Ar | 6.9852178538299574   | 16.441973391304835 | 10.270311656102416  |
| Ar | 11.751422602008923   | 4.4166550688605515 | 6.3556505177882956  |
| Ar | 12.932335441294093   | 17.186004700661897 | 6.6592733179117065  |
| Ar | 5.1079945234281876   | 22.945191606086663 | 12.675499551340383  |
| Ar | 0.80525701348339540  | 17.674811526145525 | 12.732444116763707  |
| Ar | 3.4274905600667029   | 19.886944307047589 | 0.71296155579438236 |
| Ar | 7.2543601775751441   | 17.487830071598413 | 16.833797314313792  |
| Ar | 9.8497588305511528   | 9.0248496426822911 | 1.7510483237611414  |
| Ar | 13.169737371721617   | 7.2347919171200550 | 12.481080729790976  |
| Ar | -2.7207458682122523  | 11.425722467008210 | 5.9601925160799611  |
| Ar | 6.2304988575858484   | 5.3917680267826436 | 10.472515156628589  |
| Ar | -3.5178867557777305  | 11.943185643656156 | 12.888774709160597  |
| Ar | 9.1163900792208121   | 10.834003848175449 | 8.2412049614588749  |
| Ar | 10.434807720702628   | 20.261601095252125 | 0.12026002370226831 |
| Ar | 7.3084521921679748   | 21.550962180735251 | 6.1718111201448096  |
| Ar | 2.7857493523368912   | 11.482121240335415 | 10.668667023639653  |
| Ar | 13.858676640290280   | 14.302229644577817 | 0.39333701118882974 |
| Ar | 7.5189152029715274   | 15.111329521993127 | 3.6396366208306659  |
| Ar | 15.475391761235114   | 10.613390548100433 | 6.3104767375695507  |
| Ar | 0.50041822095824284  | 22.639977063348887 | 7.3635296840557087  |
| Ar | -1.2070312162060619  | 6.3668081891444936 | 1.4581266653582634  |
| Ar | 1.8591550470750873   | 16.172629448489609 | 6.2520662886743272  |
| Ar | 1.2161667772734539   | 6.6291038867651935 | 15.194821362351702  |
| Ar | 11.704221671012171   | 21.101728211266913 | 12.234436256005235  |

|    |                     |                    |                          |
|----|---------------------|--------------------|--------------------------|
| Ar | 7.3074541804973316  | 14.335415610145610 | -2.9325241584496293      |
| Ar | 13.064189235317391  | 14.244705182659334 | 12.821668704355179       |
| Ar | 5.2564678903996880  | 3.4896846947466122 | 3.6420236931993788       |
| Ar | 0.83020959932202265 | 13.543779567179911 | 2.83940081855290488E-002 |
| Li | 5.3447101323324224  | 13.320324323529073 | 7.2976572010617113       |

## Li<sup>+</sup>Ar<sub>38</sub> cluster of PES I

Structure corresponding to the green curve:

39

Energy=-0.11883722464559590

|    |                    |                    |                    |
|----|--------------------|--------------------|--------------------|
| Ar | 10.414382424260964 | 6.2205065483316329 | 6.6694434918246692 |
| Ar | 9.0348690224257986 | 12.737622641974184 | 4.4719133900966286 |
| Ar | 16.901738269246355 | 4.5693103145843770 | 9.0654602653027361 |
| Ar | 5.0160371426525758 | 6.6145648023554786 | 11.131012482107286 |
| Ar | 11.438224628841798 | 4.9068814720487737 | 13.529818034311843 |
| Ar | 15.508221950923398 | 11.108405500425954 | 6.7866293323855409 |
| Ar | 10.154298144403093 | 11.554138929953892 | 11.415928472165556 |
| Ar | 15.813551222308957 | 20.428379665717792 | 22.994469454336990 |
| Ar | 14.137175592301187 | 17.687399723894202 | 4.6203473730322209 |
| Ar | 16.418056137734450 | 9.9527015629195876 | 13.724308537062413 |
| Ar | 21.931098884012368 | 9.4558919339953107 | 9.2139172058085634 |
| Ar | 13.789995730505089 | 22.951331121056882 | 9.2433481933874084 |
| Ar | 8.6748529946929018 | 18.083465811093156 | 9.0768430213464875 |
| Ar | 15.081068537144969 | 16.330782302226059 | 11.566967304267335 |
| Ar | 11.139723264219693 | 10.325544905959296 | 18.096969558162307 |
| Ar | 17.898973419847916 | 3.3124227748708495 | 15.893712251678203 |
| Ar | 5.6783338077452230 | 10.594123703804922 | 22.681017504505562 |

|    |                    |                    |                    |
|----|--------------------|--------------------|--------------------|
| Ar | 6.0311794728769375 | 5.3360119779572894 | 18.050894293647698 |
| Ar | 20.540040614137649 | 16.062101298270580 | 6.9805533494888090 |
| Ar | 22.933871912306870 | 8.1948803909841157 | 16.041227884588267 |
| Ar | 21.616744804774488 | 14.777329112442178 | 13.843750771089969 |
| Ar | 12.428444131709455 | 3.7026223189758505 | 20.418926758942650 |
| Ar | 3.6419901678084399 | 13.133981346438638 | 8.9393315561753877 |
| Ar | 4.6049688312942045 | 11.882648919547158 | 15.820334833499551 |
| Ar | 17.543340958367050 | 8.5721728418189418 | 20.590161168929075 |
| Ar | 3.2868616536455346 | 18.467322871294897 | 13.628301916287480 |
| Ar | 20.189855076107619 | 21.321768792973096 | 11.607360440151268 |
| Ar | 22.572141343010415 | 13.528558946210019 | 20.728831587268225 |
| Ar | 9.8041359169799271 | 16.704348646845840 | 15.941277958284488 |
| Ar | 12.077547306703460 | 8.9632152155551079 | 25.044283127158238 |
| Ar | 10.713461243314319 | 15.544826623011597 | 22.879594433240950 |
| Ar | 21.208605366155346 | 20.047549955983250 | 18.528081220831467 |
| Ar | 14.786332614500298 | 21.749751810286369 | 16.132921100590288 |
| Ar | 8.3252838944363035 | 23.345010016131699 | 13.774692619286679 |
| Ar | 16.067219769920836 | 15.102877793282511 | 18.249184333226339 |
| Ar | 4.2932318294646228 | 17.203131258266730 | 20.453762016352265 |
| Ar | 9.3273416452635782 | 22.085862851151365 | 20.602776191315701 |
| Ar | 17.180795432842395 | 13.911437293143845 | 25.198930444136849 |
| Li | 13.111029870570363 | 13.328470948387663 | 14.832544106210669 |

Structure corresponding to the blue curve:

39

Energy=-0.11841353094957743

|    |                    |                    |                    |
|----|--------------------|--------------------|--------------------|
| Ar | 11.431504586449194 | 17.648910032800934 | 23.136967737897464 |
| Ar | 7.0240725087441547 | 18.961154374425323 | 18.117462109662071 |



|    |                     |                    |                    |
|----|---------------------|--------------------|--------------------|
| Ar | 11.933988519001502  | 20.409796074749856 | 29.899108085176632 |
| Ar | 9.4027699124660167  | 29.312913565286607 | 22.278093534583178 |
| Ar | -3.6849450495106515 | 19.423702469690994 | 27.277168492061566 |
| Ar | 5.9967211162417078  | 22.474656103840147 | 12.298311077679255 |
| Ar | 0.59476616374814895 | 13.154240683031551 | 18.137304697151166 |
| Ar | 1.9327678654978360  | 18.860183056496137 | 22.487960543919147 |
| Ar | 8.0772333138013774  | 15.029267790488156 | 33.723903286721139 |
| Ar | 1.1389222784808963  | 16.309694820181601 | 31.741004294945583 |
| Ar | 5.5396859084541914  | 10.629768121170697 | 28.580438394295012 |
| Ar | -2.0767571909663829 | 24.237273166474171 | 21.932807122181902 |
| Ar | 6.1106696712035822  | 13.526674174345327 | 22.114443583165535 |
| Ar | 16.229411282728247  | 12.567141262498533 | 22.360408601863320 |
| Ar | 2.4329248537845429  | 28.232290336754634 | 32.250285833855784 |
| Ar | 17.579684634212235  | 18.272737762495428 | 26.148857899816168 |
| Ar | 16.297716837324685  | 19.140738399459270 | 18.771710129471664 |
| Ar | 2.8681596532909137  | 7.5010534743710480 | 22.775177444662585 |
| Ar | -1.5970240160069773 | 22.479174103827944 | 33.797611225406953 |
| Ar | -4.4898217976723673 | 17.450731293887340 | 20.576724547089551 |
| Ar | 7.3179864934644829  | 22.928942044433267 | 23.613575996809548 |
| Ar | 5.4642039462498353  | 14.980606720132300 | 12.952077032958432 |
| Ar | 8.5354316543785842  | 26.683722321089103 | 29.064546273677980 |
| Ar | 14.110856127827910  | 24.154629436604356 | 24.147302420020932 |
| Ar | 2.1425510043451372  | 22.802569814272360 | 28.025275502865135 |
| Ar | 6.2954854875611890  | 17.436638088251229 | 27.565266876376946 |
| Ar | 3.9909414247258859  | 25.623045921901213 | 18.344792180724387 |
| Ar | 5.8273728496970110  | 21.687624629763917 | 33.603646025753577 |
| Ar | 11.893722031147956  | 18.814725556708652 | 13.045601942078449 |

|    |                      |                    |                    |
|----|----------------------|--------------------|--------------------|
| Ar | -3.4474265188007696  | 26.809924626875162 | 28.359425614515278 |
| Ar | 11.211749436370615   | 24.306183360987845 | 17.596173706904310 |
| Ar | -0.40532710508576825 | 13.215091068788007 | 25.445108999663109 |
| Ar | 10.348439246405466   | 8.4121930385922141 | 23.032698511066720 |
| Ar | 6.2121621904605790   | 8.9100410596539650 | 16.811686153844363 |
| Ar | 11.416376427952558   | 13.460712198796060 | 17.438950086087129 |
| Ar | 2.8717653219359520   | 28.724780231785996 | 24.810168126075901 |
| Ar | 0.36526050476305394  | 19.933353841903745 | 15.829507033847621 |
| Ar | 12.212609650428741   | 13.224933503057061 | 28.255711063829015 |
| Li | 6.6740793642671177   | 18.237976571861669 | 22.852046779248511 |

Structure corresponding to the yellow curve:

39

Energy=-0.11786416390033086

|    |                      |                    |                    |
|----|----------------------|--------------------|--------------------|
| Ar | 16.489756215546908   | 6.2421490200337031 | 4.6533167001377329 |
| Ar | 6.2249184578062824   | 5.2886857184787335 | 10.794086062481171 |
| Ar | 15.067347505361468   | 12.650101235279143 | 2.0239992836367020 |
| Ar | 9.4881540277650807   | 5.5165650058682747 | 17.395655810923358 |
| Ar | 20.410649558984428   | 6.8821109035888091 | 10.542993751301225 |
| Ar | 9.7991266225574982   | 8.7665023391519004 | 5.7295879200881235 |
| Ar | 9.9775313766145075   | 10.588583762327298 | 12.978417078462618 |
| Ar | 9.3459182316603950   | 22.218249263182852 | 14.789365842816567 |
| Ar | -0.30005531232914828 | 15.525507408887856 | 13.141471559593271 |
| Ar | 15.156978267872482   | 11.631439764761305 | 8.7816983222628178 |
| Ar | 21.638678708580468   | 13.387875815101182 | 7.5605880743180904 |
| Ar | 4.9114916317547292   | 19.543231657983437 | 9.6179240870222333 |
| Ar | 4.6941878583213992   | 12.447385668081216 | 9.0711719673157774 |
| Ar | 11.429149293176080   | 16.928706962248032 | 11.014309917077817 |

|    |                    |                    |                    |
|----|--------------------|--------------------|--------------------|
| Ar | 16.429955788219289 | 9.8862003068985285 | 15.210705683052968 |
| Ar | 23.211314695498395 | 12.210449327356029 | 14.578620844356035 |
| Ar | 16.346623802382481 | 3.4060511703166600 | 17.331741705121047 |
| Ar | 13.421765983345892 | 4.9352537241646921 | 10.970511274888457 |
| Ar | 9.3332928187849369 | 15.941960876343616 | 4.6861826319490412 |
| Ar | 22.300417706878314 | 20.166903777067798 | 9.6662087014385687 |
| Ar | 16.333286518465759 | 18.238642252630196 | 6.2929377051179181 |
| Ar | 21.080854273815806 | 8.0120567582398223 | 20.010360328985445 |
| Ar | 3.4037606087446468 | 9.5476045520273161 | 15.642784562553461 |
| Ar | 7.9703202148039178 | 19.011804225369882 | 21.028480969151779 |
| Ar | 18.993838496527882 | 11.459536100791858 | 26.055416955932625 |
| Ar | 1.5264537696413687 | 15.232424795591571 | 20.168779595088807 |
| Ar | 10.788328437073602 | 22.693593763138800 | 7.3783229400095580 |
| Ar | 19.031401728081963 | 14.791750051098116 | 19.897273047041224 |
| Ar | 12.600804801237045 | 14.982640469487118 | 17.410410740942798 |
| Ar | 14.162369600362569 | 9.0771232238905171 | 21.558337945196584 |
| Ar | 13.348864173840870 | 15.627997517436320 | 24.183527738366898 |
| Ar | 21.577521400144544 | 20.620106292104282 | 16.681324719576633 |
| Ar | 15.984459495570395 | 22.671295940376353 | 12.234132853341830 |
| Ar | 6.2122322394669514 | 15.797714449560486 | 15.217027522465864 |
| Ar | 17.807369992635710 | 16.167923873417266 | 13.075693578292912 |
| Ar | 7.6804282646041289 | 11.729134603694268 | 20.885912902199227 |
| Ar | 2.4687307958102394 | 21.386362268076212 | 16.448149848480355 |
| Ar | 14.952788951056689 | 21.021504312652720 | 19.265756925488603 |
| Li | 13.893107089248597 | 13.368651402072285 | 13.081963739906273 |

## Li<sup>+</sup>Ar<sub>38</sub> cluster of PES II

Structure corresponding to the green curve:

39

Energy=-0.15412660598152700

|    |                           |                           |                          |
|----|---------------------------|---------------------------|--------------------------|
| Ar | 5.3731844116769869        | 9.3224960450306380        | 1.03369033098374020E-002 |
| Ar | 5.4745353472164551        | 3.0129782863587513        | 2.8355231731807247       |
| Ar | 5.7155636196776767        | 7.1825005930014605        | 20.698690787283159       |
| Ar | -0.22429366945105561      | 16.542817308912348        | 7.8309843162561137       |
| Ar | 5.7661964189663939        | 8.0343431132001442        | 13.633712493155153       |
| Ar | 11.244398186482899        | 0.70539698103647752       | 6.0033903153439931       |
| Ar | -0.22996649628741092      | 10.889826526776829        | 3.7450413066380204       |
| Ar | 11.034966019209477        | 13.383994137272346        | 0.33805310221694956      |
| Ar | 11.038014487604819        | 18.985532815750311        | 4.3900406893880861       |
| Ar | 11.056522423646943        | 7.1187673937883478        | 3.3419000027850863       |
| Ar | 5.4675815912752581        | 14.837242633199480        | 4.2328732522088313       |
| Ar | -0.12586850879299152      | 4.5821820666755588        | 6.5736714705342321       |
| Ar | 5.3863218887782498        | 20.569613616062149        | 8.1584388142649082       |
| Ar | 10.986730857182190        | 12.533268870092282        | 7.4049689815666921       |
| Ar | 8.84486570424527219E-002  | 10.202099784025847        | 10.651286763947997       |
| Ar | 11.367726893257009        | -3.32442429243675220E-003 | 12.879321958316373       |
| Ar | -0.10347960980831329      | 15.840344681200479        | 14.707576145370147       |
| Ar | 16.856886345602099        | 4.7286715458266535        | 6.3300392137146995       |
| Ar | 5.6643217427977746        | 14.029401945854183        | 10.951596105070887       |
| Ar | -3.98121719683681985E-003 | 3.8698814604120293        | 13.511067299230984       |
| Ar | 5.6786000811836086        | 2.4824660534524381        | 9.7604892971078066       |
| Ar | 16.751826771810265        | 11.093537329167317        | 3.4795098240489200       |
| Ar | 16.757982451622627        | 16.697615058754810        | 7.5276902786068431       |

|    |                           |                    |                    |
|----|---------------------------|--------------------|--------------------|
| Ar | 11.088613229179165        | 6.5381266485338276 | 10.087039655149800 |
| Ar | 11.075852375343272        | 18.084756951259543 | 11.278345759335032 |
| Ar | 11.284614817874408        | 5.7290312113515567 | 16.805433635901533 |
| Ar | 5.5100091411006353        | 19.862958225350205 | 15.034900089736107 |
| Ar | 5.6555006280734901        | 8.7081326407575830 | 7.1007199743682374 |
| Ar | 11.097415326543750        | 11.859327193869317 | 13.937841716382380 |
| Ar | 16.976989844798428        | 4.0248280937343459 | 13.206998102529873 |
| Ar | -6.28418194228456180E-004 | 9.4750299636534940 | 17.558360514554163 |
| Ar | 16.664610625371090        | 10.365806530432893 | 10.387460703929932 |
| Ar | 16.981089477820241        | 9.6773113514502480 | 17.294689754019647 |
| Ar | 5.7158160328081822        | 1.5799081790761751 | 16.647739885896993 |
| Ar | 11.279175651250206        | 17.552858223655157 | 18.203336049560995 |
| Ar | 11.376762991594362        | 11.243616577669982 | 21.028669897892325 |
| Ar | 16.879984813435676        | 15.984671278341846 | 14.465325149133598 |
| Ar | 5.6950621873862257        | 13.449159921431578 | 17.696340172833771 |
| Li | 8.3764530147284333        | 10.283749610548607 | 10.519312447606717 |

Structure corresponding to the blue curve:

39

Energy=-0.15353950827214846

|    |                    |                    |                     |
|----|--------------------|--------------------|---------------------|
| Ar | 5.4772815662200616 | 1.2909119466706223 | 3.7549886816017684  |
| Ar | 9.4052711508650297 | 4.7672093412610579 | -1.5421549146057625 |
| Ar | 17.174802653895721 | 17.908465211827366 | 14.633780943549260  |
| Ar | 3.4879603656705038 | 11.754149540679860 | 8.4972345337389132  |
| Ar | 10.471320678874799 | 9.2339402551089247 | 9.1014423749638240  |
| Ar | 17.795750821737766 | 1.4889839674959038 | 5.4688632250058609  |
| Ar | 2.6979827858816354 | 5.8162603642580573 | -1.2733912180530131 |
| Ar | 6.4113954732895717 | 10.762784103466030 | -4.8096322113337511 |

|    |                     |                      |                      |
|----|---------------------|----------------------|----------------------|
| Ar | 7.4333575640756377  | 17.207926221707993   | -0.79921308635230315 |
| Ar | 12.165346594465888  | -0.37006371341139421 | 1.9413399930695814   |
| Ar | 3.1469849030672927  | 12.288789701061354   | 1.3117229265277459   |
| Ar | 0.33990915291232315 | 6.4994797108729454   | 5.1750240654376451   |
| Ar | 3.1585958604803008  | 18.278340874095271   | 4.8443118769493019   |
| Ar | 10.834808022498059  | 11.175541046158507   | 0.10413093612946420  |
| Ar | 7.1829044943603435  | 11.482563001070059   | 14.422996721395027   |
| Ar | 16.410624750658663  | 6.6438662095991923   | 9.9490091028727150   |
| Ar | 6.0504460379961253  | 17.780720478523651   | 11.151278368905178   |
| Ar | 16.836113903079379  | 4.1369926958379226   | -1.4283942151320501  |
| Ar | 8.5956760119946409  | 14.157017186767682   | 5.2062773645503180   |
| Ar | 5.0214907882041979  | 5.2775594917102921   | 10.277702050496949   |
| Ar | 10.877108328956098  | 2.3436410718621046   | 8.2488180146182142   |
| Ar | 12.438376306459897  | 15.117279439233702   | -5.2752673709136531  |
| Ar | 13.202702768971633  | 8.2915895148254837   | -5.9362735620261216  |
| Ar | 13.337100825877195  | 6.4003138661006140   | 3.7209579165840667   |
| Ar | 9.9401101297372740  | 20.648912734703089   | 5.6894155676444935   |
| Ar | 14.430238940115069  | 11.054591029678228   | 15.101240683931147   |
| Ar | 11.955725705186888  | 22.070641385065183   | 12.197529465991520   |
| Ar | 6.9919304225259351  | 7.7326828217492665   | 4.0441434589838279   |
| Ar | 14.879434340849835  | 12.307121232552786   | 5.3526825747832101   |
| Ar | 20.104078019391014  | 8.0279906799381084   | 4.2987688372420028   |
| Ar | 10.530269652769432  | 17.020048823294836   | 16.988597047871643   |
| Ar | 17.285535236144927  | 11.215458363631374   | -1.0801229499595133  |
| Ar | 20.823381527001668  | 15.104156127824547   | 3.4723780558940560   |
| Ar | 10.732251526284003  | 5.1834477248938562   | 14.596103104933794   |
| Ar | 16.769195554690555  | 19.182606240907020   | 7.3845316848256175   |

|    |                    |                    |                    |
|----|--------------------|--------------------|--------------------|
| Ar | 19.348644716513551 | 12.978862986434432 | 10.226561921846725 |
| Ar | 14.038323492781377 | 17.249739526166479 | 1.1624013586435886 |
| Ar | 12.256391301401097 | 15.408033637737958 | 10.534056304656811 |
| Li | 10.857927901120588 | 10.191570404282681 | 4.6153009007972656 |

Structure corresponding to the yellow curve:

39

Energy=-0.15294429816172550

|    |                      |                      |                    |
|----|----------------------|----------------------|--------------------|
| Ar | -2.0409878915787139  | 8.3285233805723973   | 10.229861846828744 |
| Ar | 11.290371591493262   | 3.3630934970738435   | 20.351866477790640 |
| Ar | 9.4724535209608973   | 14.835959386186676   | 15.524520274626720 |
| Ar | 9.6826185560050426   | 9.4594774139353781   | 2.6206333310031265 |
| Ar | 9.2628598069541273   | 8.7946379427535248   | 12.458034387126308 |
| Ar | 1.1052266748278279   | 2.5118816146896874   | 7.1825984961837976 |
| Ar | -0.62237586117638699 | 7.8245253333568554   | 17.551883164356852 |
| Ar | 11.941295142112303   | 2.6928754089206355   | 2.9133500390855169 |
| Ar | 9.6157440908537382   | 13.863776011736011   | 8.1823167486551398 |
| Ar | 7.0897801608879805   | -1.9602914076614091  | 5.5835828807964578 |
| Ar | 5.1059316606086274   | 4.2514740797432147   | 1.7945688826673372 |
| Ar | 8.4670272464282128   | -3.1230415972611270  | 18.005110630740877 |
| Ar | 16.834548891111886   | 7.5051880543043907   | 1.7637010347631135 |
| Ar | 13.401772188211400   | 1.1579622150050506   | 9.4194807183771925 |
| Ar | 3.5583125927426007   | 5.5542403651416992   | 12.766861308425190 |
| Ar | 20.357950748515872   | 9.1984369182744494   | 15.635855663344469 |
| Ar | 4.2800533838200279   | 9.5850592504096568   | 7.1308198194598518 |
| Ar | 14.772866663361107   | -0.91279424210635163 | 15.792958839651050 |
| Ar | 13.378704741854447   | 7.4093950334026104   | 7.6825765109920940 |
| Ar | 6.5395109172683625   | 8.2077672402283586   | 18.487023453941617 |

|    |                     |                     |                    |
|----|---------------------|---------------------|--------------------|
| Ar | -2.0104052480466179 | 1.8365668343816839  | 13.711177182911154 |
| Ar | 13.776698360161710  | -3.7777574162685399 | 4.6835407171619394 |
| Ar | 4.1758709958070845  | -1.3802277380071024 | 12.019558405125530 |
| Ar | 9.1628718591724425  | 2.4522945431604044  | 14.185778891687526 |
| Ar | -1.0488700770392478 | 7.7321254341790082  | 3.0869053158114297 |
| Ar | 15.133527634010422  | 12.243200720195542  | 12.194505335734103 |
| Ar | 3.2883314340601864  | 12.337606905168046  | 13.454269478900102 |
| Ar | 7.8205098496840737  | 4.1075385873492634  | 8.0182941035627238 |
| Ar | 14.787316887644691  | 5.6638569448914593  | 13.812107977691770 |
| Ar | 17.768567053454113  | -4.0511470000950540 | 10.312217376948613 |
| Ar | 3.6181865378118445  | 1.8603568098492804  | 18.477739861412104 |
| Ar | 20.199002823954526  | 2.1337117790220947  | 12.428768103156330 |
| Ar | 18.629837619025640  | 1.8900802505441547  | 5.4902587032044483 |
| Ar | 10.423278671956869  | -4.3846469827489329 | 11.372718030332241 |
| Ar | 15.948841346991316  | 13.333037402734830  | 5.3435485455550946 |
| Ar | 18.191249785530676  | 3.8995012542179812  | 19.482281348422756 |
| Ar | 13.365515967623901  | 9.9001304752960557  | 18.649923923597580 |
| Ar | 19.835240865965392  | 8.0687694959292227  | 8.7562058474371067 |
| Li | 11.256182849179300  | 4.9432717668263351  | 10.943917107600017 |
